# Supplementary material for: ClpP regulates breast cancer cell proliferation, invasion and apoptosis by modulating the Src/PI3K/Akt signaling pathway
Source: PeerJ. 2020 Mar 10;8:e8754. doi: 10.7717/peerj.8754 (PMC7069407; doi:10.7717/peerj.8754)
Supplement: Supplemental Information 29 [file peerj-08-8754-s029.xlsx]

## Sheet: Sheet1
Normal	Tumor
9.5657	9.8382
9.5897	10.4581
8.9042	9.8027
8.928	9.7487
8.8542	10.4679
9.0509	10.3199
8.934	9.2227
8.8202	8.6965
8.1999	9.4572
8.9186	10.1104
9.2458	9.5552
10.2865	9.3395
8.573	9.305
8.8554	9.2828
8.3294	10.0862
9.3305	9.9449
8.5391	10.0822
9.11	9.9098
8.7712	9.5244
9.1947	9.4403
8.9193	9.8144
8.7698	9.6059
8.6892	10.1347
9.1141	10.4872
8.6378	10.3174
9.1414	9.4937
8.8298	10.0217
8.8859	9.8333
8.7638	9.4938
8.8303	10.0046
8.7718	9.4398
8.6028	9.1907
8.8772	9.7868
8.2773	9.8231
9.5779	10.1197
9.1818	10.7458
8.7348	10.1317
8.6958	9.9069
8.8316	9.6296
8.8151	9.4004
8.5794	9.1255
8.5735	9.346
9.9152	10.9872
9.955	10.1257
9.2492	9.9348
8.8208	10.564
9.3207	9.7156
8.5124	9.1328
9.2562	9.2474
8.8201	9.3063
8.7917	9.6358
8.7869	9.5423
8.5258	9.7209
8.8351	10.3028
9.1146	9.3439
8.5197	8.9932
8.4757	9.5902
8.8008	9.7179
8.4338	9.0066
9.7874	9.1109
8.8639	9.6844
9.1819	9.9725
8.2516	9.5192
8.0556	9.629
8.0913	10.1669
8.2559	9.8532
8.7002	9.6989
8.941	9.6767
7.9443	11.367
8.9036	9.5298
8.6464	9.67
9.1599	9.5772
8.6541	9.8637
7.5722	9.9435
7.2462	9.4714
8.9642	9.2158
7.3175	9.5841
8.3549	9.1012
8.3085	9.1143
8.6445	9.0939
8.661	8.5798
8.1204	9.4311
8.8725	9.0786
8.4116	9.9274
8.3394	8.9538
9.2018	9.144
9.0702	9.3838
9.8954	9.2742
8.5519	8.4911
10.1288	8.7523
10.0811	9.8095
8.8949	9.1639
8.1506	8.8087
8.6388	8.6062
8.9893	8.9046
8.449	8.658
8.3238	9.0951
9.1359	9.0218
8.2786	9.0755
8.3031	8.3116
9.0088	9.4429
8.8552	9.2145
8.8838	8.9831
9.09	9.4536
9.6004	9.6234
8.659	10.5925
8.7221	10.7473
9.1306	11.6252
8.9522	11.4054
9.4476	10.8663
8.9245	9.8258
8.9052	10.0255
	9.5195
	10.2927
	9.6954
	9.3246
	9.1446
	9.9044
	9.5238
	9.8969
	10.4166
	9.6291
	10.5001
	8.6344
	9.9625
	9.2009
	9.0754
	9.7592
	9.5422
	9.5383
	8.8282
	10.0887
	9.2389
	9.3557
	8.8312
	7.9999
	9.1394
	8.8795
	8.8083
	8.8772
	8.5759
	9.7316
	9.5479
	10.3785
	9.7768
	10.762
	10.018
	9.715
	9.5199
	9.6738
	9.4477
	8.8194
	9.2866
	9.7325
	12.0375
	10.6184
	9.1707
	9.4451
	9.8291
	10.9473
	9.3746
	10.7495
	9.3023
	9.9301
	9.0465
	9.4216
	8.991
	9.6981
	9.4551
	10.4714
	9.5024
	9.3956
	9.2907
	9.4644
	9.9841
	8.9528
	9.1632
	9.2792
	8.8554
	9.079
	8.9599
	9.087
	9.0797
	8.8037
	9.9811
	9.5399
	9.3271
	9.6119
	9.575
	10.2728
	9.2827
	9.5504
	9.5869
	9.0905
	9.2887
	10.0988
	9.2116
	9.0451
	9.8191
	9.6219
	9.5219
	8.7282
	9.4241
	10.273
	8.647
	9.7317
	8.7564
	9.1051
	9.3389
	9.4649
	8.9151
	9.3346
	9.1822
	9.175
	9.8267
	9.6244
	8.9543
	9.3273
	9.5814
	9.6386
	9.1642
	9.7603
	9.1833
	9.5638
	10.5481
	9.1044
	9.2368
	9.5518
	9.8059
	8.729
	10.1243
	9.2873
	9.0902
	8.2544
	9.3183
	9.8927
	9.8912
	9.0678
	9.5882
	9.4057
	9.3085
	9.4124
	9.6221
	9.2511
	9.1395
	8.6787
	8.8556
	9.9312
	8.8524
	9.3337
	10.6744
	9.1219
	9.129
	9.1785
	9.3138
	8.6672
	9.4496
	10.1086
	9.5843
	11.4989
	10.1812
	9.68
	9.8303
	10.3058
	10.5098
	10.367
	9.7903
	9.3365
	9.8475
	9.6666
	9.4548
	11.301
	10.0658
	10.718
	10.6762
	9.416
	10.191
	9.2016
	9.7399
	10.2024
	8.3577
	9.6437
	9.7581
	9.4048
	9.7102
	10.1633
	9.767
	10.2459
	9.1099
	9.7566
	9.6226
	9.0908
	9.6533
	10.4627
	9.5649
	9.3886
	9.9517
	9.0493
	9.1551
	9.3478
	9.6746
	9.1089
	9.8939
	9.98
	8.906
	8.9685
	9.3526
	8.973
	9.3255
	9.4664
	9.4266
	9.8377
	9.5279
	8.3764
	8.816
	9.3269
	9.6656
	9.9515
	8.944
	9.0438
	9.2005
	9.1649
	10.2887
	10.3913
	9.2442
	9.1618
	9.2765
	9.7045
	9.3746
	9.8295
	10.1293
	10.175
	9.4948
	9.4297
	9.3843
	10.511
	9.404
	9.9894
	9.6413
	9.1927
	9.4914
	9.7755
	9.548
	10.0371
	9.0598
	8.9896
	9.5644
	10.3478
	9.7652
	10.3138
	9.22
	10.2613
	9.6839
	8.3546
	9.6402
	9.7051
	9.5672
	10.045
	8.2705
	8.9839
	10.5699
	8.38
	9.0305
	9.6252
	8.5599
	11.2326
	9.2839
	10.0549
	8.8822
	9.9243
	10.4198
	9.3053
	9.3678
	9.6671
	9.4686
	8.8167
	9.1138
	10.8347
	10.3981
	9.7903
	9.2909
	9.9462
	9.3255
	10.2361
	9.5444
	9.0775
	10.57
	9.5722
	9.3846
	9.3323
	8.8139
	9.3156
	8.2597
	9.602
	9.846
	8.9688
	9.6892
	10.1443
	9.2695
	9.1182
	9.5268
	9.1666
	9.5298
	8.5431
	9.3488
	9.467
	9.2395
	9.0316
	8.3895
	9.0163
	8.7665
	9.1528
	9.1771
	8.7707
	8.5247
	9.0773
	8.9354
	9.0298
	8.8888
	8.9315
	8.9365
	8.9797
	9.0922
	8.6346
	9.0872
	9.4036
	10.0899
	9.5682
	10.6597
	9.0085
	9.5702
	8.9688
	8.98
	9.5475
	9.1983
	10.0224
	9.773
	9.7988
	9.727
	10.4562
	10.6591
	9.1333
	10.587
	9.988
	9.6011
	9.973
	9.3451
	10.0115
	9.7491
	8.9927
	9.2258
	9.4596
	10.351
	10.2328
	9.8609
	10.3326
	8.9894
	10.5714
	9.8642
	9.7099
	9.5761
	9.4527
	9.2837
	9.7826
	9.3733
	9.435
	9.8193
	9.9912
	8.9606
	9.5756
	9.8389
	10.1367
	9.3749
	10.1713
	9.8607
	9.7007
	9.6248
	9.4638
	9.1284
	9.2255
	9.6128
	8.4639
	10.1948
	9.4501
	9.9768
	10.2225
	10.2443
	8.8095
	8.7721
	10.0209
	9.1401
	9.64
	9.5102
	8.6785
	9.9581
	9.417
	8.9896
	10.587
	9.3719
	9.9554
	9.2586
	9.3672
	10.0419
	9.3676
	9.3792
	8.9632
	9.9123
	8.8223
	9.6853
	8.6437
	9.5637
	9.8584
	9.5687
	9.1108
	9.0966
	9.5713
	8.0081
	9.8207
	10.3174
	9.2919
	9.2419
	9.8179
	9.5856
	9.736
	9.9683
	9.2706
	9.9417
	8.9651
	9.1733
	9.3124
	9.2232
	9.7994
	9.0749
	9.1773
	9.7362
	9.6759
	9.7939
	9.8121
	10.3655
	11.0789
	8.5827
	9.1039
	9.2012
	9.1581
	9.6226
	9.0618
	9.4499
	10.1245
	8.7097
	8.5802
	9.6592
	9.3258
	8.9506
	9.8981
	9.6847
	10.5588
	8.9829
	9.6329
	9.4297
	9.5669
	10.4914
	9.7864
	9.3966
	9.8222
	9.6657
	10.2602
	9.3998
	9.1383
	10.1411
	9.757
	9.0429
	9.1164
	9.6537
	8.6235
	8.9782
	10.0898
	9.414
	8.8586
	9.5606
	9.2513
	8.9786
	9.0646
	9.5424
	8.8768
	9.0256
	9.849
	9.553
	9.7989
	10.3155
	8.3624
	9.6596
	9.5018
	8.7059
	8.9921
	10.1355
	8.7684
	8.2395
	9.0965
	8.4168
	8.7096
	9.3551
	8.55
	8.0271
	7.9448
	10.1303
	8.3638
	8.6275
	10.1592
	9.6428
	8.5102
	9.3498
	8.616
	9.3713
	9.0252
	7.8092
	9.1083
	9.5822
	8.4833
	8.8893
	9.061
	9.5921
	9.4447
	9.8071
	10.7512
	10.3162
	10.2044
	10.4325
	10.6949
	10.1941
	9.5597
	10.4217
	8.9177
	9.4047
	9.9044
	8.6884
	9.097
	9.5138
	9.246
	9.6993
	8.2494
	9.9303
	9.9074
	9.4125
	9.2434
	10.1354
	8.7929
	10.1392
	9.9596
	9.6636
	10.4475
	9.8743
	9.4051
	9.6988
	9.3787
	9.1839
	9.7184
	9.7981
	9.3616
	9.4299
	8.5317
	8.9072
	8.8103
	9.3094
	9.4807
	9.4523
	9.4821
	10.4169
	8.9807
	8.1559
	10.1535
	9.256
	9.1306
	8.5629
	8.7407
	9.0935
	10.0037
	9.7269
	10.0489
	8.9307
	9.1784
	9.0879
	9.3147
	9.6699
	10.1692
	9.2314
	8.9895
	8.4436
	8.2987
	9.0844
	8.0809
	9.0633
	8.5604
	9.3639
	8.5131
	9.0734
	9.1676
	8.8608
	9.7011
	8.7761
	9.8789
	8.548
	10.1323
	9.2766
	9.5531
	10.4789
	8.6147
	8.9225
	9.3765
	9.7122
	8.8822
	9.0568
	9.4489
	9.8196
	9.152
	9.1828
	9.1777
	9.5652
	9.0214
	9.4369
	9.5708
	10.0711
	9.1124
	8.7827
	8.7975
	8.9852
	8.5389
	9.4713
	8.8744
	8.405
	9.0987
	9.6965
	8.7497
	9.6014
	9.0224
	11.1939
	9.6167
	10.1624
	9.5609
	9.1073
	9.2722
	8.7246
	8.6762
	8.3493
	9.8366
	9.2408
	9.4446
	9.4021
	8.8706
	9.5469
	9.5286
	9.7423
	9.3278
	9.3912
	9.627
	9.3649
	9.789
	9.4234
	10.4195
	9.4077
	9.5775
	9.371
	9.6816
	9.7389
	9.6578
	9.2324
	9.7969
	9.9256
	9.3456
	9.3535
	9.9073
	9.6245
	9.798
	9.6899
	9.5359
	9.8664
	9.5815
	8.568
	9.9827
	8.2174
	8.5659
	9.3774
	9.3729
	9.3959
	9.1464
	9.9787
	9.1966
	9.9286
	10.4938
	8.9111
	9.1868
	8.5929
	8.6146
	9.5056
	8.8811
	8.9922
	8.3393
	9.7012
	9.5323
	9.1698
	9.403
	8.8486
	9.7248
	8.5217
	9.3555
	9.2058
	9.2613
	8.8293
	8.9428
	7.5825
	9.9904
	9.531
	10.1341
	8.7178
	9.9486
	9.6657
	10.1156
	9.4976
	9.1447
	10.1452
	9.2201
	10.2721
	9.0034
	9.0658
	8.983
	9.7565
	9.2783
	9.1823
	10.0135
	8.9847
	8.7865
	10.1941
	10.1912
	10.3819
	7.2948
	10.3897
	9.1064
	10.6615
	9.8969
	8.8871
	10.7927
	9.7641
	9.4554
	10.3417
	9.7762
	11.7437
	9.6399
	11.8822
	11.1569
	11.8323
	9.0658
	9.3836
	9.438
	9.1554
	10.2548
	9.6523
	9.6458
	8.8628
	9.6185
	9.548
	8.9001
	9.7547
	9.7253
	9.4753
	10.0165
	9.9124
	9.6511
	9.3009
	9.8843
	8.6169
	10.2485
	9.3327
	11.2023
	9.9984
	10.8366
	9.9848
	10.6599
	9.4126
	9.3442
	7.8726
	10.5368
	8.2981
	8.8462
	8.4029
	8.7992
	8.7823
	9.5976
	9.562
	9.6011
	10.0672
	10.3992
	9.9181
	9.1379
	9.9632
	9.2281
	9.4929
	9.3485
	9.179
	9.1937
	9.4318
	10.7179
	9.9204
	9.1796
	9.4766
	8.9845
	8.5724
	8.9943
	9.8182
	9.4321
	10.1432
	9.9803
	9.5907
	10.8264
	10.2033
	9.4761
	9.9412
	10.0354
	9.4246
	10.3058
	9.5338
	10.5765
	10.2807
	9.0185
	9.0993
	10.0726
	9.7749
	9.7404
	9.4908
	10.0405
	10.3743
	9.6618
	10.3534
	11.3225
	9.7478
	9.6556
	10.1101
	9.8247
	10.7383
	9.4945
	9.7575
	10.5019
	10.3932
	9.6316
	10.3219
	9.518
	10.0083
	9.2909
	9.4655
	9.5439
	10.651
	10.8332
	11.9665
	10.2862
	10.0803
	9.7655
	10.4887
	11.0516
	10.7595
	9.4825
	10.1292
	9.9748
	11.2829
	10.3353
	10.3913
	11.043
	9.9315
	9.9866
	10.0456
	10.5588
	11.4255
	10.4264
	9.8113
	9.8268
	9.4705
	11.0706
	9.6949
	9.8949
	10.7483
	10.3535
	10.4487
	9.8943
	9.7751
	9.9402
	10.9383
	10.4835
	11.076
	11.0987
	10.2633
	10.4206
	10.2388
	10.183
	10.1456
	9.9286
	9.1254
	9.6171
	9.7885
	9.154
	10.679
	9.6665
	10.3582
	9.8377
	9.7775
	10.1225
	10.8331
	10.1547
	9.9093
	9.2182
	9.6793
	9.2162
	10.3007
	9.9137
