# Supplementary material for: ClpP regulates breast cancer cell proliferation, invasion and apoptosis by modulating the Src/PI3K/Akt signaling pathway
Source: PeerJ. 2020 Mar 10;8:e8754. doi: 10.7717/peerj.8754 (PMC7069407; doi:10.7717/peerj.8754)
Supplement: Supplemental Information 33 [file peerj-08-8754-s033.xlsx]

## Sheet: n=990 table 1
ClpP	ER	PR	HER2	T	N	M	Age	Stage	sample
7.2948	Negative	Negative	Negative	T2	N0	M0	50	Stage IIA	TCGA-E2-A1LG-01
7.5825	Positive	Positive	Positive	T2	N1	M0	45	Stage IIB	TCGA-E2-A1B1-01
7.8092	Positive	Negative	Negative	T2	N2	M0	44	Stage IIIA	TCGA-BH-A1FM-01
7.8726	Positive	Positive	Negative	T1c	N0	MX	38	Stage I	TCGA-EW-A1IY-01
7.9448	Positive	Positive	Negative	T1c	N1a	M0	62	Stage IIA	TCGA-BH-A1F5-01
7.9999	Negative	Negative	Negative	T1	N0	M0	55	Stage IA	TCGA-A7-A26F-01
8.0081	Negative	Negative	Negative	T1c	N0	M0	71	Stage I	TCGA-BH-A0BW-01
8.0271	Positive	Positive	Positive	T4b	N1b	M0	53	Stage IIIB	TCGA-BH-A1F2-01
8.0809	Negative	Negative	Positive	T4b	NX	M0	60		TCGA-D8-A1JA-01
8.1559	Positive	Positive	Negative	T2	N0	M0	59	Stage IIA	TCGA-C8-A26Z-01
8.2174	Negative	Negative	Negative	T2	N0	M0	48	Stage IIA	TCGA-E2-A150-01
8.2395	Positive	Positive	Negative	T1	N0	M0	83	Stage I	TCGA-BH-A1EU-01
8.2494	Negative	Negative	Positive	T1	N2	M0	78	Stage IIIA	TCGA-C8-A12Q-01
8.2544	Positive	Positive	Negative	T2	N0	M0	51	Stage IIA	TCGA-A8-A09V-01
8.2597	Positive	Positive	Negative	T3	N1	M0	60	Stage IIIA	TCGA-AR-A1AL-01
8.2705	Positive	Positive	Negative	T3	N0 (i+)	M0	46	Stage IIB	TCGA-AO-A1KO-01
8.2981	Positive	Positive	Negative	T2	N1a	M0	38	Stage IIB	TCGA-EW-A1J1-01
8.2987	Positive	Positive	Negative	T2	N1a	M0	77	Stage IIB	TCGA-D8-A1J8-01
8.3116	Positive	Positive	Negative	T2	N1a	M0	50	Stage IIB	TCGA-A2-A25C-01
8.3393	Positive	Positive	Negative	T2	N0	M0	44	Stage IIA	TCGA-E2-A15I-01
8.3493	Negative	Negative	Negative	T1c	N0	M0	59	Stage IA	TCGA-D8-A27M-01
8.3546	Negative	Negative	Positive	T1c	N1a	M0	43	Stage IIA	TCGA-AO-A12D-01
8.3624	Negative	Negative	Negative	T2	N1b	M0	48	Stage IIB	TCGA-BH-A18V-01
8.3638	Positive	Positive	Negative	T4b	N2	M0	90	Stage IIIB	TCGA-BH-A1F8-01
8.3764	Positive	Negative	Negative	T2	N2	M0	54	Stage IIIA	TCGA-AN-A0XT-01
8.38	Positive	Positive	Negative	T2	N0 (i-)	M0	69	Stage IIA	TCGA-AO-A1KS-01
8.3895	Positive	Positive	Negative	T2	N2	M0	38	Stage IIIA	TCGA-AR-A24M-01
8.4029	Positive	Positive	Positive	T1c	N0	M0	61	Stage IA	TCGA-EW-A1J3-01
8.405	Negative	Positive	Negative	T2	N0	M0	53	Stage IIA	TCGA-D8-A1XW-01
8.4168	Negative	Negative	Negative	T2	N1b	M0	38	Stage IIA	TCGA-BH-A1EW-01
8.4436	Negative	Negative	Negative	T2	N0	M0	45		TCGA-D8-A147-01
8.4639	Negative	Negative	Positive	T4b	N1	M0	57	Stage IIIB	TCGA-B6-A1KN-01
8.4833	Negative	Negative	Positive	T1c	N0	M0	44	Stage IA	TCGA-BH-A1FU-01
8.4911	Positive	Positive	Negative	T3	N0 (i+)	M0	74	Stage IIB	TCGA-A2-A1FV-01
8.5102	Positive	Positive	Negative	T2	N1	M0	31	Stage IIB	TCGA-BH-A1FE-01
8.5131	Positive	Positive	Negative	T1c	N1a	M0	62	Stage IIA	TCGA-D8-A1JE-01
8.5217	Positive	Positive	Negative	T1c	N0	M0	61	Stage IA	TCGA-E2-A15P-01
8.5247	Positive	Positive	Negative	T1	N0	M0	61	Stage I	TCGA-AR-A24S-01
8.5317	Negative	Negative	Positive	T2	N1	M0	53	Stage IIB	TCGA-C8-A1HK-01
8.5389	Negative	Negative	Positive	T1c	N1a	M0	61	Stage IIA	TCGA-D8-A1XT-01
8.5431	Positive	Positive	Positive	T1	N0	M0	64	Stage I	TCGA-AR-A1AX-01
8.548	Negative	Negative	Negative	T2	N0	M0	72	Stage IIA	TCGA-D8-A1JL-01
8.5599	Negative	Negative	Negative	T2	N0 (i+)	M0	45	Stage IIA	TCGA-AQ-A04J-01
8.5604	Positive	Positive	Negative	T2	N2a	M0	59	Stage IIIA	TCGA-D8-A1JC-01
8.5629	Positive	Positive	Negative	T2	N1	M0	48	Stage IIB	TCGA-C8-A27A-01
8.5659	Positive	Negative	Positive	T1c	N0	M0	56	Stage I	TCGA-E2-A152-01
8.568	Positive	Positive	Positive	T2	N0	M0	35	Stage IIA	TCGA-E2-A14Y-01
8.5724	Negative	Negative	Negative	T1c	N1a	M0	52	Stage IIA	TCGA-EW-A1PH-01
8.5759	Positive	Positive	Positive	T2	N2a	MX	53	Stage IIIA	TCGA-A7-A2KD-01
8.5798	Positive	Positive	Positive	T2	N3a	M0	63	Stage IIIC	TCGA-A2-A0YG-01
8.5802	Positive	Positive	Negative	T1c	N0	M0	46	Stage I	TCGA-BH-A0H3-01
8.5827	Positive	Positive	Negative	T2	N1a	M0	79	Stage IIB	TCGA-BH-A0E7-01
8.5929	Positive	Positive	Positive	T1c	N1a	M0	40	Stage IIA	TCGA-E2-A15E-01
8.6062	Negative	Negative	Positive	T2	N1	M0	85	Stage IIB	TCGA-A2-A1G1-01
8.6146	Positive	Positive	Positive	T1c	N1a	M0	40	Stage IIA	TCGA-E2-A15E-06
8.6147	Positive	Positive	Negative	T2	N0	M0	70	Stage IIA	TCGA-D8-A1JT-01
8.616	Positive	Negative	Negative	T2	N1b	M1	47	Stage IV	TCGA-BH-A1FH-01
8.6169	Negative	Positive	Negative	T2	N1	M0	42	Stage IIB	TCGA-E9-A22H-01
8.6235	Negative	Negative	Negative	T1c	N0 (i-)	M0	82	Stage I	TCGA-BH-A0WA-01
8.6275	Positive	Positive	Negative	T2	N1b	M0	60	Stage IIB	TCGA-BH-A1FB-01
8.6344	Positive	Negative	Negative	T2	N0 (i-)	M0	78	Stage IIA	TCGA-A7-A0CG-01
8.6346	Positive	Positive	Negative	T1	N0	M0	50	Stage I	TCGA-AR-A252-01
8.6437	Positive	Positive	Negative	T1b	N0	M0	54	Stage I	TCGA-BH-A0BO-01
8.647	Positive	Positive	Negative	T2	N3a	M1	45	Stage IV	TCGA-A8-A08O-01
8.658	Negative	Negative	Negative	T2	N2a	M0	50	Stage IIIA	TCGA-A2-A1G6-01
8.6672	Positive	Positive	Negative	T2	N3a	M0	45	Stage IIIC	TCGA-AC-A2FK-01
8.6762	Positive	Positive	Negative	T1c	N2a	M0	49	Stage IIIA	TCGA-D8-A27L-01
8.6785	Positive	Positive	Negative	T2	N1a	M0	66	Stage IIB	TCGA-BH-A0B1-01
8.6787	Positive	Positive	Positive	T2	N1	MX	62	Stage IIB	TCGA-AC-A23C-01
8.6884	Negative	Negative	Positive	T2	N0 (i-)	M0	67	Stage IIA	TCGA-C8-A12L-01
8.6965	Positive	Positive	Negative	T2	N0	M0	59	Stage IIA	TCGA-A1-A0SD-01
8.7059	Positive	Positive	Negative	T1c	N1	M0	68	Stage IIA	TCGA-BH-A1EO-01
8.7096	Positive	Positive	Negative	T2	N1b	M0	67	Stage IIB	TCGA-BH-A1EX-01
8.7097	Positive	Positive	Negative	T1c	N0 (i-)	M0	69	Stage IA	TCGA-BH-A0H0-01
8.7178	Positive	Positive	Negative	T1c	N0	M0	63	Stage IA	TCGA-E2-A1BC-01
8.7246	Positive	Positive	Negative	T2	N1a	M0	47	Stage IIB	TCGA-D8-A27K-01
8.7282	Positive	Positive	Negative	T2	N0	M0	53	Stage IIA	TCGA-A8-A08I-01
8.729	Positive	Positive	Positive	T2	N3a	M0	57	Stage IIIC	TCGA-A8-A09N-01
8.7407	Negative	Negative	Negative	T3	N0	M0	48	Stage IIB	TCGA-C8-A27B-01
8.7497	Positive	Positive	Negative	T1c	N2a	MX	65	Stage IIIA	TCGA-D8-A1Y0-01
8.7523	Positive	Negative	Negative	T3	N2a	M0	62	Stage IIIA	TCGA-A2-A1FW-01
8.7564	Negative	Negative	Negative	T2	N1a	M0	52	Stage IIB	TCGA-A8-A08R-01
8.7665	Positive	Positive	Negative	T3	N2	M0	43	Stage IIIA	TCGA-AR-A24O-01
8.7684	Positive	Positive	Negative	T1	N0	M0	55	Stage I	TCGA-BH-A1ET-01
8.7707	Positive	Positive	Negative	T1	N2	M0	45	Stage IIIA	TCGA-AR-A24R-01
8.7721	Negative	Negative	Negative	T1c	N0	M0	52	Stage I	TCGA-BH-A0AV-01
8.7761	Positive	Positive	Negative	T2	N0	M0	54	Stage IIA	TCGA-D8-A1JJ-01
8.7823	Positive	Positive	Negative	T1c	N0 (i-)	M0	70	Stage I	TCGA-EW-A1J6-01
8.7827	Positive	Positive	Negative	T2	N1a	M0	56	Stage IIB	TCGA-D8-A1XO-01
8.7865	Positive	Positive	Negative	T1c	N1mi	M0	40	Stage IIA	TCGA-E2-A1L9-01
8.7929	Negative	Negative	Positive	T2	N1	M0	45	Stage IIB	TCGA-C8-A12Z-01
8.7975	Negative	Negative	Negative	T2	N0	M0	69	Stage IIA	TCGA-D8-A1XQ-01
8.7992	Positive	Positive	Negative	T3	N0 (i-)	M0	59	Stage IIB	TCGA-EW-A1J5-01
8.8037	Negative	Negative	Negative	T2	N0	M0	51	Stage IIA	TCGA-A8-A07O-01
8.8083	Negative	Negative	Negative	T2	N0	M0	65	Stage IIA	TCGA-A7-A26I-01
8.8087	Positive	Positive	Negative	T2	N1a	M0	49	Stage IIB	TCGA-A2-A1G0-01
8.8095	Positive	Positive	Negative	T2	N0	M0	45	Stage IIA	TCGA-BH-A0AU-01
8.8103	Positive	Positive	Negative	T2	N0	M0	74	Stage IIA	TCGA-C8-A1HM-01
8.8139	Positive	Negative	Negative	T1	N0	M0	83	Stage I	TCGA-AR-A1AJ-01
8.816	Negative	Negative	Negative	T2	N0	M0	54	Stage IIA	TCGA-AN-A0XU-01
8.8167	Negative	Negative	Negative	T2	N1	M0	46	Stage IIB	TCGA-AR-A0TS-01
8.8194	Negative	Negative	Negative	T2	N0	M0	52	Stage IIA	TCGA-A7-A4SD-01
8.8223	Negative	Negative	Negative	T1c	N0	M0	35	Stage I	TCGA-BH-A0BL-01
8.8282	Positive	Negative	Negative	T2	N1	MX	62	Stage IIB	TCGA-A7-A13E-01
8.8293	Negative	Negative	Negative	T2	N1a	M0	63	Stage IIB	TCGA-E2-A1AZ-01
8.8312	Positive	Positive	Negative	T3	N1a	MX	71	Stage IIIA	TCGA-A7-A26E-01
8.8462	Positive	Positive	Negative	T1c	N1mi	MX	50	Stage IIB	TCGA-EW-A1J2-01
8.8486	Positive	Positive	Negative	T2	N0	M0	66	Stage IIA	TCGA-E2-A15M-01
8.8524	Positive	Negative	Positive	T2	NX	M0	90	Stage IIA	TCGA-AC-A23H-01
8.8554	Positive	Positive	Negative	T2	N1a	M0	65	Stage IIB	TCGA-A8-A07F-01
8.8556	Positive	Positive	Negative	T2	N1	MX	50	Stage IIB	TCGA-AC-A23E-01
8.8586	Positive	Positive	Negative	T1c	N1a	cM0 (i+)	53	Stage IIA	TCGA-BH-A18I-01
8.8608	Positive	Positive	Negative	T1c	N0	M0	56	Stage IA	TCGA-D8-A1JH-01
8.8628	Positive	Positive	Negative	T2	N1	M0	28	Stage IIB	TCGA-E9-A1NE-01
8.8706	Positive	Positive	Negative	T2	N0	M0	62	Stage IIA	TCGA-D8-A27V-01
8.8744	Positive	Positive	Negative	T2	N0	M0	84	Stage IIA	TCGA-D8-A1XV-01
8.8768	Negative	Negative	Negative	T1	N0	M0	60	Stage I	TCGA-BH-A18P-01
8.8772	Positive	Positive	Negative	T2	N0	M0	49	Stage IIA	TCGA-A7-A26J-01
8.8795	Positive	Negative	Positive	T1	N1a	M0	72	Stage IIA	TCGA-A7-A26H-01
8.8811	Positive	Positive	Negative	T2	N0	M0	76	Stage IIA	TCGA-E2-A15G-01
8.8822	Positive	Positive	Negative	T2	N0	MX	40	Stage IIIC	TCGA-AQ-A1H3-01
8.8822	Positive	Positive	Negative	T2	N3a	MX	49	Stage IIA	TCGA-D8-A1X7-01
8.8871	Negative	Negative	Negative	T1c	N0	M0	46	Stage IA	TCGA-E2-A1LS-01
8.8888	Positive	Positive	Negative	T2	N1	M0	55	Stage IIB	TCGA-AR-A24W-01
8.8893	Positive	Positive	Negative	T1	N0	M0	64	Stage IA	TCGA-BH-A201-01
8.9001	Positive	Positive	Negative	T2	N1	M0	71	Stage IIB	TCGA-E9-A1NH-01
8.9046	Positive	Positive	Negative	T3	N1a	M0	71	Stage IIIA	TCGA-A2-A1G4-01
8.906	Positive	Positive	Negative	T1c	N0	M0	55	Stage IB	TCGA-AN-A0FY-01
8.9072	Positive	Negative	Positive	T3	N1	M0	38	Stage IIIA	TCGA-C8-A1HL-01
8.9111	Positive	Positive	Negative	T1c	N0	M0	61	Stage I	TCGA-E2-A15C-01
8.9151	Positive	Positive	Negative	T4b	N3a	M0	76	Stage IIIB	TCGA-A8-A08Z-01
8.9225	Positive	Positive	Negative	T1c	N0	M0	51	Stage IA	TCGA-D8-A1JU-01
8.9307	Positive	Positive	Negative	T1c	N0	M0	52	Stage IA	TCGA-D8-A13Y-01
8.9315	Positive	Positive	Negative	T2	N0	M0	52	Stage IIA	TCGA-AR-A24X-01
8.9354	Negative	Negative	Positive	T1	N1	M0	47	Stage IIA	TCGA-AR-A24U-01
8.9365	Positive	Positive	Negative	T2	N0	M0	57	Stage IIA	TCGA-AR-A24Z-01
8.9428	Negative	Negative	Positive	T2	N2	M0	50	Stage IIIA	TCGA-E2-A1B0-01
8.944	Positive	Positive	Negative	T1c	N0 (i-)	M0	29	Stage I	TCGA-AO-A03M-01
8.9506	Positive	Positive	Negative	T1c	N2a	M0	65	Stage IIIA	TCGA-BH-A0H7-01
8.9528	Positive	Positive	Positive	T2	N0	M0	69	Stage IIA	TCGA-A8-A07B-01
8.9538	Positive	Negative	Negative	T2	N0 (i-)	M0	61	Stage IIA	TCGA-A2-A0YK-01
8.9543	Positive	Positive	Negative	T1c	N0	M0	45	Stage I	TCGA-A8-A095-01
8.9599	Positive	Negative	Positive	T2	N2a	M0	69	Stage IIIA	TCGA-A8-A07I-01
8.9606	Positive	Positive	Negative	T2	N1	M0	61	Stage IIB	TCGA-B6-A0WT-01
8.9632	Negative	Negative	Negative	T1	N0	M0	73	Stage I	TCGA-BH-A0BG-01
8.9651	Positive	Negative	Negative	T2	N0	M0	64	Stage IIA	TCGA-BH-A0DL-01
8.9685	Positive	Negative	Positive	T2	N2	M0	45	Stage IIIA	TCGA-AN-A0FZ-01
8.9688	Positive	Negative	Negative	T1	N1	M0	47	Stage IIA	TCGA-AR-A1AO-01
8.9688	Positive	Positive	Negative	T1	N1	M0	49	Stage II	TCGA-AR-A2LM-01
8.973	Positive	Positive	Negative	T2	N0	M0	61	Stage IIA	TCGA-AN-A0XL-01
8.9782	Positive	Positive	Negative	T2	N0	M0	50	Stage IIA	TCGA-BH-A18F-01
8.9786	Positive	Positive	Negative	T3	N1mi	M0	50	Stage IIIA	TCGA-BH-A18L-01
8.9797	Positive	Negative	Positive	T2	N0	M0	58	Stage IIA	TCGA-AR-A250-01
8.98	Positive	Positive	Negative	T2	N0	M0	65	Stage IIA	TCGA-AR-A2LN-01
8.9807	Negative	Negative	Negative	T2	N0	M0	90	Stage IIA	TCGA-C8-A26Y-01
8.9829	Positive	Positive	Negative	T1c	N0 (i-)	M0	77	Stage IA	TCGA-BH-A0HF-01
8.983	Positive	Positive	Negative	T1c	N0	M0	37	Stage I	TCGA-E2-A1IO-01
8.9831	Negative	Positive	Negative	T2	N0 (i-)	M0	66	Stage IIA	TCGA-A2-A25F-01
8.9839	Positive	Positive	Negative	T1	N1	M0	77	Stage IIA	TCGA-AO-A1KP-01
8.9845	Positive	Positive	Negative	T2	N1a	MX	53	Stage IIB	TCGA-EW-A1PG-01
8.9847	Positive	Positive	Negative	T2	N1a	M0	52	Stage IIA	TCGA-E2-A1L8-01
8.9852	Positive	Positive	Negative	T2	N1a	M0	56	Stage IIB	TCGA-D8-A1XR-01
8.9894	Positive	Positive	Negative	T4b	N1b	M0	44	Stage IIIB	TCGA-B6-A0RI-01
8.9895	Positive	Positive	Negative	T2	N0	MX	57	Stage IIA	TCGA-D8-A146-01
8.9896	Negative	Negative	Negative	T2	N0 (i-)	M0	38	Stage IIA	TCGA-AO-A124-01
8.9896	Positive	Positive	Negative	T2	N2a	M0	40	Stage IIIA	TCGA-BH-A0B5-01
8.991	Positive	Negative	Positive	T2	N1a	M0	69	Stage IIB	TCGA-A8-A06R-01
8.9921	Positive	Positive	Negative	T2	N1a	M0	35	Stage IIB	TCGA-BH-A1ES-01
8.9922	Positive	Positive	Positive	T1c	N1mi	M0	38	Stage IIA	TCGA-E2-A15H-01
8.9927	Positive	Positive	Negative	T3	N0 (i-)	M0	75	Stage IIB	TCGA-B6-A0IM-01
8.9932	Positive	Positive	Negative	T2	N0 (i-)	M0	52	Stage IIA	TCGA-A2-A0ES-01
8.9943	Negative	Negative	Positive	T1b	N3a	MX	59	Stage IIIC	TCGA-EW-A2FR-01
9.0034	Positive	Positive	Negative	T1c	N1a	M0	78	Stage IIA	TCGA-E2-A1IL-01
9.0066	Positive	Positive	Negative	T1c	N0 (i-)	M0	80	Stage IA	TCGA-A2-A0EV-01
9.0085	Positive	Positive	Negative	T3	N2	M0	62	Stage III	TCGA-AR-A2LK-01
9.0163	Positive	Positive	Negative	T1	N0	M0	54	Stage I	TCGA-AR-A24N-01
9.0185	Negative	Negative	Negative	T1c	N0 (i+)	M0	58	Stage I	TCGA-GM-A2DH-01
9.0214	Positive	Negative	Negative	T4b	N1a	M0	86	Stage IIIB	TCGA-D8-A1XG-01
9.0218	Positive	Positive	Negative	T2	N0 (i-)	M0	44	Stage IIA	TCGA-A2-A25A-01
9.0224	Positive	Positive	Negative	T2	N0	MX	71	Stage IIA	TCGA-D8-A1Y2-01
9.0252	Positive	Positive	Negative	T2	N1b	M0	69	Stage IIB	TCGA-BH-A1FL-01
9.0256	Negative	Negative	Negative	T2	N1b	M0	56	Stage IIB	TCGA-BH-A18Q-01
9.0298	Positive	Positive	Negative	T2	N1	M0	52	Stage IIB	TCGA-AR-A24V-01
9.0305	Positive	Positive	Negative	T1	N1	M0	78	Stage IIA	TCGA-AO-A1KT-01
9.0316	Positive	Positive	Negative	T2	N1	M0	26	Stage IIB	TCGA-AR-A24L-01
9.0429	Positive	Positive	Negative	T2	N0 (i-)	M0	46	Stage IIA	TCGA-BH-A0W4-01
9.0438	Positive	Positive	Negative	T2	N1a	M0	59	Stage IIB	TCGA-AO-A03N-01
9.0451	Positive	Positive	Positive	T2	N0	M0	65	Stage IIA	TCGA-A8-A08C-01
9.0465	Positive	Positive	Negative	T1c	N2a	M0	63	Stage IIIA	TCGA-A8-A06P-01
9.0493	Negative	Negative	Negative	T2	N0	M0	62	Stage IIA	TCGA-AN-A0FL-01
9.0598	Positive	Positive	Positive	T2	N1	M0	40	Stage IIB	TCGA-AO-A0JM-01
9.061	Positive	Positive	Positive	T2	N0	M0	60	Stage II	TCGA-BH-A202-01
9.0618	Positive	Positive	Negative	T1c	N1a	M0	51	Stage IIA	TCGA-BH-A0EI-01
9.0633	Positive	Positive	Positive	T2	N1a	M0	54	Stage IIB	TCGA-D8-A1JB-01
9.0646	Positive	Positive	Positive	T3	N1	M0	39	Stage IIIA	TCGA-BH-A18M-01
9.0658	Positive	Positive	Negative	T1c	N0	M0	60	Stage I	TCGA-E2-A1IN-01
9.0658	Positive	Positive	Negative	T2	N2	M0	41	Stage IIIA	TCGA-E9-A1N4-01
9.0678	Positive	Positive	Negative	T2	N0	M0	84	Stage IIA	TCGA-A8-A0A1-01
9.0734	Negative	Negative	Negative	T1c	N2a	M0	79	Stage IIIA	TCGA-D8-A1JF-01
9.0749	Positive	Positive	Negative	T1c	N1a	M0	41	Stage IIA	TCGA-BH-A0DT-01
9.0754	Negative	Negative	Negative	T2	N0 (i-)	M0	62	Stage IIA	TCGA-A7-A0DA-01
9.0755	Positive	Positive	Negative	T2	N1	M0	39	Stage IIB	TCGA-A2-A25B-01
9.0773	Positive	Positive	Negative	T3	N3	M0	46	Stage IIIC	TCGA-AR-A24T-01
9.0775	Positive	Positive	Negative	T2	N2	M0	47	Stage IIIA	TCGA-AR-A0U2-01
9.0786	Positive	Positive	Negative	T1c	N0 (i+)	M0	62	Stage I	TCGA-A2-A0YI-01
9.079	Positive	Positive	Negative	T1c	N1a	M0	65	Stage IIA	TCGA-A8-A07G-01
9.0797	Positive	Positive	Negative	T3	N1a	M0	58	Stage IIIA	TCGA-A8-A07L-01
9.0844	Positive	Negative	Positive	T1c	N0	M0	48	Stage IA	TCGA-D8-A1J9-01
9.087	Positive	Positive	Negative	T2	N1a	M0	35	Stage IIB	TCGA-A8-A07J-01
9.0872	Positive	Positive	Positive	T2	N2	M0	50	Stage IIIA	TCGA-AR-A254-01
9.0879	Positive	Positive	Positive	T2	N1a	M0	62	Stage IIB	TCGA-D8-A140-01
9.0902	Positive	Positive	Negative	T1c	N0	MX	68	Stage X	TCGA-A8-A09T-01
9.0905	Positive	Negative	Negative	T2	N1a	M0	81	Stage IIB	TCGA-A8-A084-01
9.0908	Positive	Negative	Negative	T2	N2	M0	70	Stage IIIA	TCGA-AN-A0AS-01
9.0922	Positive	Negative	Negative	T2	N2	M0	51	Stage IIIA	TCGA-AR-A251-01
9.0935	Negative	Negative	Negative	T4b	N0	M0	60	Stage IIIB	TCGA-C8-A3M7-01
9.0939	Positive	Negative	Negative	T1b	N0 (i+)	M0	67	[Discrepancy]	TCGA-A2-A0YF-01
9.0951	Positive	Positive	Negative	T1c	N0 (i-)	M0	70	Stage IA	TCGA-A2-A259-01
9.0965	Positive	Positive	Positive	T3	N1b	M0	45	Stage IIIA	TCGA-BH-A1EV-01
9.0966	Positive	Positive	Negative	T1c	N1mi	M0	56	Stage IIA	TCGA-BH-A0BT-01
9.097	Positive	Negative	Negative	T2	N0 (i-)	M0	70	Stage IIA	TCGA-C8-A12M-01
9.0987	Positive	Positive	Positive	T2	N0	MX	74	Stage IIA	TCGA-D8-A1XY-01
9.0993	Negative	Negative	Negative	T1c	N0 (i+)	M0	52	Stage I	TCGA-GM-A2DI-01
9.1012	Positive	Positive	Negative	T3	N0 (i+)	M0	63	Stage IIB	TCGA-A2-A0YD-01
9.1039	Positive	Positive	Negative	T2	N1a	M0	53	Stage IIB	TCGA-BH-A0E9-01
9.1044	Positive	Negative	Positive	T3	N3a	M0	79	Stage IIIC	TCGA-A8-A09G-01
9.1051	Positive	Positive	Positive	T1c	N1	M0	71	Stage IIA	TCGA-A8-A08S-01
9.1064	Negative	Negative	Negative	T2	N1	M0	57	Stage IIB	TCGA-E2-A1LI-01
9.1073	Negative	Negative	Negative	T2	N0	M0	72	Stage IIA	TCGA-D8-A27H-01
9.1083	Positive	Positive	Negative	T2	N0	M0	34	Stage IIA	TCGA-BH-A1FN-01
9.1089	Negative	Negative	Positive	T2	N0	M0	58	Stage IIA	TCGA-AN-A0FV-01
9.1099	Negative	Negative	Negative	T4	N0	M0	41	Stage IIIB	TCGA-AN-A0AL-01
9.1108	Positive	Positive	Negative	T3	N1c	M0	55	Stage IIIA	TCGA-BH-A0BS-01
9.1109	Positive	Positive	Negative	T1b	N3a	M0	53	Stage IIIC	TCGA-A2-A0EW-01
9.1124	Positive	Positive	Negative	T1c	N0	M0	57	Stage IA	TCGA-D8-A1XM-01
9.1138	Positive	Negative	Negative	T2	N2	M0	53	Stage IIIA	TCGA-AR-A0TT-01
9.1143	Negative	Negative	Negative	T2	N1a	M0	48	Stage IIB	TCGA-A2-A0YE-01
9.1164	Positive	Positive	Negative	T1c	N1a	M0	77	Stage IIA	TCGA-BH-A0W5-01
9.1182	Positive	Positive	Negative	T2	N1	M0	54	Stage IIB	TCGA-AR-A1AS-01
9.1219	Positive	Positive	Negative	T2	N1a	MX	41	Stage IIB	TCGA-AC-A2BM-01
9.1254	Positive	Positive	Negative	T2	N0	M0	64	Stage IIA	TCGA-S3-A6ZF-01
9.1255	Positive	Positive	Negative	T2	N1a	M0	67	Stage IIB	TCGA-A2-A0CW-01
9.1284	Positive	Negative	Negative	T2	N1	M0	67	Stage IIA	TCGA-B6-A1KC-01
9.129	Positive	Positive	Positive	T2	N0	MX	65	Stage IIA	TCGA-AC-A2FB-01
9.1306	Negative	Negative	Positive	T2	N2	M0	61	Stage IIIA	TCGA-C8-A278-01
9.1328	Positive	Positive	Negative	T1c	N0 (i-)	M0	42	Stage IA	TCGA-A2-A0D3-01
9.1379	Negative	Negative	Negative	T2	N3b	MX	68	Stage IIIC	TCGA-EW-A1P1-01
9.1383	Positive	Negative	Positive	T1c	N0	M0	60	Stage I	TCGA-BH-A0HY-01
9.1394	Negative	Negative	Negative	T2	N0 (i+)	M0	50	Stage IIA	TCGA-A7-A26G-01
9.1395	Positive	Positive	Negative	T1c	N0	M0	83	Stage I	TCGA-A8-A0AD-01
9.1401	Positive	Positive	Negative	T2	N0 (i-)	M0	62	Stage IIA	TCGA-BH-A0AY-01
9.144	Positive	Positive	Negative	T3	N2a	M0	48	Stage IIIA	TCGA-A2-A0YL-01
9.1446	Positive	Positive	Negative	T3	N3a	M0	46	Stage IIIC	TCGA-A2-A4RY-01
9.1447	Positive	Positive	Negative	T1c	N0	M0	80	Stage I	TCGA-E2-A1IH-01
9.1464	Positive	Positive	Negative	T1c	N0	M0	61	Stage I	TCGA-E2-A156-01
9.152	Positive	Positive	Negative	T2	N1a	M0	62	Stage IIB	TCGA-D8-A1XB-01
9.1528	Positive	Positive	Negative	T1	N0	M0	47	Stage I	TCGA-AR-A24P-01
9.154	Positive	Positive	Negative	T2	N1a	M0	63	Stage IIB	TCGA-S3-AA0Z-01
9.1551	Positive	Positive	Negative	T1c	N0	M0	61	Stage IB	TCGA-AN-A0FN-01
9.1554	Negative	Positive	Negative	T2	N0	M0	58	Stage IIA	TCGA-E9-A1N9-01
9.1581	Positive	Positive	Negative	T1c	N0 (i-)	M0	69	Stage IA	TCGA-BH-A0EB-01
9.1618	Positive	Positive	Negative	T1c	N0 (i-)	M0	41	Stage I	TCGA-AO-A03V-01
9.1632	Negative	Negative	Negative	T2	N0	M0	57	Stage IIA	TCGA-A8-A07C-01
9.1639	Positive	Positive	Negative	T2	N0 (i-)	M0	63	Stage IIA	TCGA-A2-A1FZ-01
9.1642	Positive	Positive	Negative	T2	NX	M0	40	Stage X	TCGA-A8-A09A-01
9.1649	Positive	Positive	Negative	T2	N1	M0	54	Stage IIB	TCGA-AO-A03P-01
9.1666	Positive	Positive	Negative	T2	N2	M0	39	Stage IIIA	TCGA-AR-A1AU-01
9.1676	Negative	Negative	Negative	T2	N0	M0	62	Stage IIA	TCGA-D8-A1JG-01
9.1698	Positive	Positive	Negative	T2	N1a	M0	58	Stage IIA	TCGA-E2-A15K-06
9.1707	Positive	Positive	Negative	T1c	N1a	M0	47	Stage IIA	TCGA-A7-A5ZW-01
9.1733	Positive	Positive	Negative	T1c	N0	M0	78	Stage I	TCGA-BH-A0DO-01
9.175	Positive	Positive	Negative	T2	N2a	M0	48	Stage IIIA	TCGA-A8-A092-01
9.1771	Positive	Negative	Negative	T3	N0	M0	49	Stage IIB	TCGA-AR-A24Q-01
9.1773	Positive	Positive	Negative	T2	N2a	M0	54	Stage IIIA	TCGA-BH-A0DV-01
9.1777	Positive	Positive	Negative	T1c	N2a	M0	36	Stage IIIA	TCGA-D8-A1XD-01
9.1784	Negative	Negative	Negative	T2	N2a	M0	51		TCGA-D8-A13Z-01
9.1785	Positive	Positive	Negative	T2	N1	MX	40	Stage IIB	TCGA-AC-A2FF-01
9.179	Negative	Negative	Negative	T2	N0 (i-)	M0	59	Stage IIA	TCGA-EW-A1P7-01
9.1796	Positive	Positive	Negative	T1c	N1a	M0	56	Stage IIA	TCGA-EW-A1PE-01
9.1822	Positive	Negative	Negative	T2	N0	M0	61	Stage IIA	TCGA-A8-A091-01
9.1823	Positive	Positive	Negative	T1c	N1mi	M0	44	Stage IIA	TCGA-E2-A1L6-01
9.1828	Positive	Positive	Negative	T4b	N1a	M0	85	Stage IIIB	TCGA-D8-A1XC-01
9.1833	Positive	Positive	Negative	T2	N0	MX	69	Stage X	TCGA-A8-A09C-01
9.1839	Positive	Positive	Negative	T2	N0	M0	59	Stage IIA	TCGA-C8-A1HE-01
9.1868	Positive	Positive	Negative	T2	N0	M0	47	Stage IIA	TCGA-E2-A15D-01
9.1907	Negative	Negative	Negative	T2	N0 (i-)	M0	40	Stage IIA	TCGA-A2-A0CM-01
9.1927	Positive	Positive	Negative	T1c	N1a	M0	68	Stage IIA	TCGA-AO-A0JF-01
9.1937	Negative	Negative	Negative	T2	N3b	M0	58	Stage IIIC	TCGA-EW-A1P8-01
9.1966	Negative	Negative	Negative	T2	N0	M0	50	Stage IIA	TCGA-E2-A159-01
9.1983	Positive	Positive	Negative	T3	N0	M0	59	Stage IIB	TCGA-AR-A2LQ-01
9.2005	Positive	Positive	Negative	T2	N0 (i-)	M0	69	Stage IIA	TCGA-AO-A03O-01
9.2009	Positive	Negative	Negative	T2	N0 (i-)	M0	37	Stage IIA	TCGA-A7-A0D9-01
9.2012	Positive	Positive	Negative	T1c	N1a	M0	72	Stage IIA	TCGA-BH-A0EA-01
9.2016	Positive	Positive	Positive	T2	N0 (i-)	MX	71	Stage IIA	TCGA-AC-A8OS-01
9.2058	Positive	Negative	Negative	T2	N1	M0	34	Stage IIB	TCGA-E2-A15S-01
9.2116	Positive	Negative	Positive	T2	N0	M0	52	Stage IIA	TCGA-A8-A08B-01
9.2158	Positive	Positive	Negative	T2	N0 (i+)	M0	51	Stage IIA	TCGA-A2-A0T7-01
9.2162	Positive	Positive	Negative	T3	N0	MX	68	Stage IIB	TCGA-XX-A89A-01
9.2182	Positive	Positive	Negative	T1c	N0 (i-)	MX	77	Stage IA	TCGA-WT-AB44-01
9.22	Positive	Positive	Negative	T2	N0 (i+)	M0	47	Stage IIA	TCGA-AO-A12A-01
9.2201	Positive	Positive	Negative	T1c	N0	M0	57	Stage I	TCGA-E2-A1IJ-01
9.2227	Positive	Negative	Negative	T1c	N0	M0	70	Stage I	TCGA-A1-A0SB-01
9.2232	Positive	Positive	Negative	T2	N1	M0	42	Stage IIB	TCGA-BH-A0DQ-01
9.2255	Negative	Negative	Positive	T2	N1	M0	68	Stage IIB	TCGA-B6-A1KF-01
9.2281	Negative	Negative	Negative	T2	N0 (i-)	M0	43	Stage IIA	TCGA-EW-A1P4-01
9.2314	Positive	Positive	Negative	T1c	N1a	M0	80	Stage IIA	TCGA-D8-A145-01
9.2324	Positive	Positive	Negative	T2	N0 (i-)	M0	47	Stage IIA	TCGA-E2-A10F-01
9.2368	Positive	Positive	Positive	T2	N0	M0	84	Stage IIA	TCGA-A8-A09I-01
9.2389	Positive	Positive	Negative	T2	N0	MX	79	Stage IIA	TCGA-A7-A13G-01
9.2395	Positive	Positive	Negative	T2	N0	M0	46	Stage IIA	TCGA-AR-A24K-01
9.2408	Positive	Positive	Negative	T1c	N0	M0	64	Stage IA	TCGA-D8-A27P-01
9.2419	Positive	Negative	Negative	T1c	N0	M0	47	Stage I	TCGA-BH-A0C3-01
9.2434	Positive	Positive	Negative	T4	N1	M0	49	Stage IIIB	TCGA-C8-A12W-01
9.2442	Negative	Negative	Negative	T1c	N0 (i-)	M0	31	Stage I	TCGA-AO-A03U-01
9.246	Positive	Positive	Negative	T2	N0 (i-)	M0	50	Stage IIA	TCGA-C8-A12O-01
9.2474	Positive	Positive	Negative	T2	N1a	M0	37	Stage IIB	TCGA-A2-A0D4-01
9.2511	Positive	Positive	Positive	T2	N0	M0	54	Stage IIA	TCGA-A8-A0AB-01
9.2513	Positive	Positive	Negative	T1	N0	M0	46	Stage I	TCGA-BH-A18K-01
9.256	Positive	Positive	Negative	T2	N0	M0	63	Stage IIA	TCGA-C8-A274-01
9.2586	Negative	Negative	Negative	T1c	N0 (i-)	M0	44	Stage IA	TCGA-BH-A0B9-01
9.2613	Positive	Positive	Negative	T2	N0	M0	65	Stage IIA	TCGA-E2-A15T-01
9.2695	Negative	Negative	Negative	T1	N2	M0	50	Stage IIIA	TCGA-AR-A1AR-01
9.2706	Positive	Positive	Negative	T2	N1a	M0	63	Stage IIB	TCGA-BH-A0DI-01
9.2722	Positive	Positive	Negative	T1c	N2a	M0	58	Stage IIIA	TCGA-D8-A27I-01
9.2742	Positive	Negative	Negative	T4b	N2a	M0	56	Stage IIIB	TCGA-A2-A0YT-01
9.2765	Negative	Negative	Negative	T1c	N0 (i-)	M0	41	Stage IA	TCGA-AO-A0J2-01
9.2766	Positive	Positive	Negative	T3	N3a	MX	80	Stage IIIC	TCGA-D8-A1JN-01
9.2783	Positive	Positive	Negative	T1c	N0 (mol+)	M0	60	Stage IA	TCGA-E2-A1IU-01
9.2792	Positive	Positive	Negative	T4b	N3a	MX	81	Stage X	TCGA-A8-A07E-01
9.2827	Positive	Positive	Negative	T2	N0	M0	80	Stage IIA	TCGA-A8-A081-01
9.2828	Positive	Positive	Negative	T3	N1a	M0	39	Stage IIIA	TCGA-A1-A0SJ-01
9.2837	Positive	Positive	Negative	T3	N0 (i-)	M0	68	Stage IIB	TCGA-B6-A0RQ-01
9.2839	Positive	Positive	Positive	T2	N2a	MX	70	Stage IIIA	TCGA-AQ-A0Y5-01
9.2866	Negative	Negative	Negative	T2	N0	M0	54	Stage IIA	TCGA-A7-A4SE-01
9.2873	Positive	Positive	Negative	T2	N1	M0	82	Stage IIB	TCGA-A8-A09R-01
9.2887	Positive	Positive	Negative	T1c	N1a	M0	59	Stage IIA	TCGA-A8-A086-01
9.2907	Positive	Positive	Positive	T2	N1a	M0	42	Stage IIB	TCGA-A8-A075-01
9.2909	Positive	Positive	Positive	T1	N0 (i-)	M0	61	Stage IIA	TCGA-AR-A0TX-01
9.2909	Positive	Positive	Negative	T1c	N1	MX	64	Stage IA	TCGA-LL-A440-01
9.2919	Positive	Positive	Negative	T3	N2a	M0	61	Stage IIIA	TCGA-BH-A0C1-01
9.3009	Positive	Positive	Negative	T2	N2	M0	56	Stage IIIA	TCGA-E9-A22E-01
9.3023	Positive	Negative	Negative	T4b	N0	M0	66	Stage IIIB	TCGA-A8-A06N-01
9.305	Positive	Positive	Negative	T2	N1a	M0	52	Stage IIB	TCGA-A1-A0SI-01
9.3053	Positive	Positive	Negative	T2	N2a	M0	55	Stage IIIA	TCGA-AQ-A7U7-01
9.3063	Positive	Positive	Negative	T1	N0 (i-)	M0	73	Stage IA	TCGA-A2-A0EM-01
9.3085	Positive	Positive	Negative	T2	N3a	M0	64	Stage IIIC	TCGA-A8-A0A6-01
9.3124	Positive	Positive	Negative	T3	N0 (i-)	M0	60	Stage IIB	TCGA-BH-A0DP-01
9.3138	Positive	Negative	Negative	T2	N1a	MX	79	Stage IIB	TCGA-AC-A2FG-01
9.3147	Positive	Positive	Negative	T1c	N1	M0	40		TCGA-D8-A141-01
9.3156	Positive	Positive	Negative	T1	N0	M0	70	Stage I	TCGA-AR-A1AK-01
9.3183	Positive	Positive	Negative	T2	N3	M0	70	Stage IIIB	TCGA-A8-A09W-01
9.3246	Positive	Positive	Negative	T2	N0	M0	67	Stage IIA	TCGA-A2-A4RX-01
9.3255	Negative	Positive	Negative	T2	N2	M0	68	Stage IIIA	TCGA-AN-A0XN-01
9.3255	Positive	Positive	Negative	T2	N2	M1	43	Stage IIIA	TCGA-AR-A0TZ-01
9.3258	Positive	Positive	Negative	T1b	NX	M0	82	Stage I	TCGA-BH-A0H6-01
9.3269	Positive	Positive	Negative	T2	N2	M0	67	Stage IIIA	TCGA-AN-A0XV-01
9.3271	Positive	Negative	Negative	T2	N0	M0	73	Stage IIA	TCGA-A8-A07S-01
9.3273	Positive	Positive	Negative	T2	N0	M0	73	Stage IIA	TCGA-A8-A096-01
9.3278	Positive	Positive	Negative	T1c	N0	M0	68	Stage IA	TCGA-D8-A4Z1-01
9.3323	Negative	Negative	Negative	T2	N0	M0	47	Stage IIA	TCGA-AR-A1AI-01
9.3337	Positive	Positive	Negative	T3	N0 (i-)	M0	84	Stage IIB	TCGA-AC-A2B8-01
9.3346	Positive	Positive	Positive	T2	N0	M0	74	Stage IIA	TCGA-A8-A090-01
9.3365	Positive	Positive	Positive	T1c	N3a	MX	74	Stage IIIC	TCGA-AC-A3YI-01
9.3389	Positive	Positive	Positive	T2	N1a	M1	64	Stage IV	TCGA-A8-A08T-01
9.3395	Negative	Positive	Negative	T2	N0 (i-)	M0	39	Stage IIA	TCGA-A1-A0SH-01
9.3439	Positive	Positive	Negative	T1c	N1mi	M0	63	Stage IB	TCGA-A2-A0ER-01
9.3442	Positive	Positive	Negative	T1b	N1a	MX	48	Stage IIA	TCGA-EW-A1IX-01
9.3451	Positive	Positive	Negative	T3	N1b	M0	81	Stage IIIA	TCGA-B6-A0IH-01
9.3456	Negative	Negative	Positive	T2	N3	M0	79	Stage IIIC	TCGA-E2-A14P-01
9.346	Positive	Negative	Positive	T2	N0 (i-)	M0	52	Stage IIA	TCGA-A2-A0CX-01
9.3478	Positive	Negative	Negative	T1c	N0	M0	55	Stage IB	TCGA-AN-A0FS-01
9.3485	Positive	Positive	Negative	T2	N1a	M0	64	Stage IIB	TCGA-EW-A1P6-01
9.3488	Negative	Negative	Negative	T1	N0	M0	65	Stage I	TCGA-AR-A1AY-01
9.3498	Positive	Positive	Negative	T1c	NX	M0	88	Stage I	TCGA-BH-A1FG-01
9.3526	Negative	Negative	Negative	T2	N0	M0	56	Stage IIA	TCGA-AN-A0G0-01
9.3535	Positive	Positive	Negative	T2	N1mi	M0	50	Stage IIA	TCGA-E2-A14Q-01
9.3551	Positive	Positive	Negative	T2	N0	M0	79	Stage IIA	TCGA-BH-A1EY-01
9.3555	Positive	Positive	Negative	T1c	N1a	M0	64	Stage IIA	TCGA-E2-A15R-01
9.3557	Positive	Positive	Negative	T2	N1a	MX	61	Stage IIB	TCGA-A7-A13H-01
9.3616	Positive	Positive	Negative	T2	N2	M0	40	Stage IIIA	TCGA-C8-A1HI-01
9.3639	Positive	Positive	Negative	T2	N1a	M0	41	Stage IIB	TCGA-D8-A1JD-01
9.3649	Positive	Positive	Negative	T2	N0	M0	53	Stage IIA	TCGA-D8-A73X-01
9.3672	Positive	Positive	Negative	T3	N3a	M0	51	Stage IIIC	TCGA-BH-A0BA-01
9.3676	Positive	Positive	Negative	T1c	N1a	M0	47	Stage IIA	TCGA-BH-A0BD-01
9.3678	Positive	Negative	Negative	T2	N0	M0	43	Stage IIA	TCGA-AR-A0TP-01
9.371	Positive	Positive	Negative	T3	N0 (i-)	M0	41	Stage IIB	TCGA-E2-A10A-01
9.3713	Negative	Positive	Negative	T3	N1b	M0	66	Stage IIIA	TCGA-BH-A1FJ-01
9.3719	Positive	Positive	Positive	T2	N1a	M0	42	Stage IIB	TCGA-BH-A0B7-01
9.3729	Positive	Positive	Negative	T1c	N0	M0	68	Stage I	TCGA-E2-A154-01
9.3733	Negative	Negative	Negative	T3	N1	M0	39	Stage IIIA	TCGA-B6-A0RT-01
9.3746	Positive	Positive	Negative	T1c	N0	M0	68	Stage IIA	TCGA-A7-A6VX-01
9.3746	Negative	Negative	Negative	T2	N0 (i-)	M0	41	Stage IA	TCGA-AO-A0J4-01
9.3749	Positive	Negative	Negative	T3	N1b	M0	40	Stage IIIA	TCGA-B6-A0WY-01
9.3765	Positive	Positive	Positive	T2	N3a	MX	81	Stage IIIC	TCGA-D8-A1X5-01
9.3774	Positive	Positive	Negative	T1c	N1a	M0	51	Stage IIB	TCGA-E2-A153-01
9.3787	Positive	Negative	Positive	T2	N2	M0	54	Stage IIIA	TCGA-C8-A138-01
9.3792	Positive	Positive	Negative	T2	N1mi	M0	56	Stage IIB	TCGA-BH-A0BF-01
9.3836	Positive	Positive	Negative	T2	N1	M0	45	Stage IIB	TCGA-E9-A1N5-01
9.3838	Negative	Negative	Negative	T2	N0 (i-)	M0	67	Stage IIA	TCGA-A2-A0YM-01
9.3843	Positive	Positive	Negative	T2	N3	M0	36	Stage IIIC	TCGA-AO-A0JA-01
9.3846	Positive	Negative	Negative	T2	N1	M0	51	Stage IIB	TCGA-AR-A1AH-01
9.3886	Positive	Negative	Negative	T2	N2	M1	59	Stage IV	TCGA-AN-A0FJ-01
9.3912	Positive	Positive	Negative	T2	N0	M0	88	Stage IIA	TCGA-D8-A73U-01
9.3956	Positive	Positive	Negative	T3	N0	M0	84	Stage IIB	TCGA-A8-A06Z-01
9.3959	Positive	Negative	Negative	T2	N1a	M0	58	Stage IIB	TCGA-E2-A155-01
9.3966	Positive	Negative	Negative	T3	N2a	M0	65	Stage IIIA	TCGA-BH-A0HP-01
9.3998	Positive	Positive	Negative	T2	N1a	M0	54	Stage IIB	TCGA-BH-A0HX-01
9.4004	Positive	Positive	Negative	T2	N1a	M0	41	Stage IIB	TCGA-A2-A0CV-01
9.4021	Positive	Positive	Negative	T2	N3a	M0	53	Stage IIIC	TCGA-D8-A27T-01
9.403	Positive	Positive	Negative	T2	N0	M0	65	Stage IIA	TCGA-E2-A15L-01
9.4036	Positive	Positive	Positive	T1	N0	M0	62	Stage I	TCGA-AR-A255-01
9.404	Positive	Positive	Negative	T2	N0 (i-)	M0	64	Stage IIA	TCGA-AO-A0JC-01
9.4047	Positive	Positive	Negative	T2	N1a	M0	54	Stage IIB	TCGA-BH-A8G0-01
9.4048	Positive	Positive	Negative	T2	N2	M0	36	Stage IIIA	TCGA-AN-A04A-01
9.4051	Negative	Negative	Positive	T2	N1	M0	64	Stage IIB	TCGA-C8-A135-01
9.4057	Positive	Positive	Negative	T2	N0	M0	73	Stage IIA	TCGA-A8-A0A4-01
9.4077	Positive	Positive	Negative	T2	N2a	M0	64	Stage IIIA	TCGA-E2-A108-01
9.4124	Negative	Negative	Positive	T2	N1a	M0	57	Stage IIB	TCGA-A8-A0A7-01
9.4125	Negative	Negative	Negative	T2	N0	M0	55	Stage IIA	TCGA-C8-A12V-01
9.4126	Positive	Positive	Positive	T2	N1a	MX	80	Stage IIB	TCGA-EW-A1IW-01
9.414	Positive	Positive	Negative	T1b	N0	M0	63	Stage IA	TCGA-BH-A18H-01
9.417	Negative	Negative	Negative	T2	N1a	M0	53	Stage IIB	TCGA-BH-A0B3-01
9.4216	Positive	Positive	Negative	T3	N2	M0	63	Stage IIIA	TCGA-A8-A06Q-01
9.4234	Positive	Positive	Negative	T1c	N1mi	M0	34	Stage IB	TCGA-E2-A106-01
9.4241	Positive	Negative	Negative	T4b	N3	M1	52	Stage IV	TCGA-A8-A08J-01
9.4246	Positive	Positive	Positive	T2	N1b	M0	46	Stage IIB	TCGA-GM-A2DA-01
9.4266	Positive	Positive	Negative	T2	N2	M0	69	Stage IIIA	TCGA-AN-A0XP-01
9.4297	Positive	Positive	Negative	T2	N1	M0	61	Stage IIIC	TCGA-AO-A0J9-01
9.4297	Positive	Negative	Negative	T2	N3	M0	81	Stage IIB	TCGA-BH-A0HK-01
9.4299	Negative	Negative	Negative	T2	N0	M0	53	Stage IIA	TCGA-C8-A1HJ-01
9.4311	Positive	Positive	Negative	T2	N2a	M0	53	Stage IIIA	TCGA-A2-A0YH-01
9.4318	Positive	Positive	Negative	T2	N1a	M0	59	Stage IIB	TCGA-EW-A1PA-01
9.4321	Positive	Positive	Negative	T3	N3a	MX	39	Stage IIIC	TCGA-EW-A2FV-01
9.435	Negative	Negative	Negative	T1c	N0 (i-)	M0	49	Stage IA	TCGA-B6-A0RU-01
9.4369	Positive	Positive	Positive	T3	N1a	MX	76	Stage IIIA	TCGA-D8-A1XJ-01
9.438	Positive	Positive	Positive	T2	N1	M0	52	Stage IIB	TCGA-E9-A1N6-01
9.4398	Positive	Positive	Negative	T3	N2a	M0	37	Stage IIIA	TCGA-A2-A0CL-01
9.4403	Positive	Positive	Negative	T1c	N0 (i-)	M0	66	Stage IA	TCGA-A2-A04N-01
9.4429	Positive	Negative	Negative	T2	N3a	M0	90	Stage IIIC	TCGA-A2-A25D-01
9.4446	Positive	Positive	Negative	T2	N3a	M0	41	Stage IIIC	TCGA-D8-A27R-01
9.4447	Positive	Positive	Negative	T2	N1a	M0	46	Stage IIB	TCGA-BH-A28Q-01
9.4451	Positive	Positive	Negative	T2	N3a	M0	48	Stage IIIC	TCGA-A7-A5ZX-01
9.4477	Positive	Negative	Negative	T3	N0	MX	62	Stage IIB	TCGA-A7-A4SC-01
9.4489	Positive	Positive	Negative	T2	N1a	M0	66	Stage IIB	TCGA-D8-A1X9-01
9.4496	Positive	Negative	Negative	T2	N1	MX	65	Stage IIB	TCGA-AC-A2FO-01
9.4499	Positive	Positive	Negative	T2	N1	M0	67	Stage IIA	TCGA-BH-A0GY-01
9.4501	Negative	Negative	Negative	T1c	N0 (i-)	M0	47	Stage I	TCGA-B6-A402-01
9.4523	Positive	Positive	Negative	T3	N2	M0	47	Stage IIIA	TCGA-C8-A26V-01
9.4527	Positive	Positive	Negative	T2	N1b	M0	73	Stage IIIB	TCGA-B6-A0RP-01
9.4536	Positive	Positive	Negative	T2	N1a	M0	55	Stage IIB	TCGA-A2-A3KC-01
9.4551	Positive	Positive	Positive	T2	N1a	M0	80	Stage IIB	TCGA-A8-A06U-01
9.4554	Positive	Positive	Positive	T2	N3	M0	43	Stage IIIC	TCGA-E2-A3DX-01
9.4572	Positive	Positive	Negative	T1c	N0 (i-)	M0	56	Stage I	TCGA-A1-A0SE-01
9.4596	Positive	Positive	Negative	T1c	N0 (i-)	M0	74	Stage IA	TCGA-B6-A0IP-01
9.4638	Positive	Positive	Negative	T1c	NX	MX	62	Stage X	TCGA-B6-A0X7-01
9.4644	Positive	Positive	Positive	T2	N0	M0	66	Stage IIA	TCGA-A8-A076-01
9.4649	Negative	Negative	Positive	T4d	N3a	M0	43	Stage IIIC	TCGA-A8-A08X-01
9.4655	Negative	Negative	Negative	T1c	N0	MX	62	Stage IA	TCGA-LL-A441-01
9.4664	Positive	Negative	Negative	T2	N2	M0	59	Stage IIIA	TCGA-AN-A0XO-01
9.467	Positive	Positive	Negative	T2	N0	M0	65	Stage IIA	TCGA-AR-A24H-01
9.4686	Positive	Positive	Negative	T2	N1	M0	68	Stage IIB	TCGA-AR-A0TR-01
9.4705	Positive	Positive	Negative	T2	N3	MX	43	Stage IIIC	TCGA-OL-A5RV-01
9.4713	Positive	Positive	Negative	T1c	N0	M0	56	Stage IA	TCGA-D8-A1XU-01
9.4714	Positive	Positive	Negative	T3	N0 (i-)	M0	50	Stage IIB	TCGA-A2-A0T6-01
9.4753	Positive	Positive	Negative	T2	N1	M0	42	Stage IIB	TCGA-E9-A227-01
9.4761	Positive	Positive	Negative	T4b	N0	MX	63	Stage IIIB	TCGA-GI-A2C8-01
9.4766	Positive	Positive	Negative	T1c	N0	M0	50	Stage IA	TCGA-EW-A1PF-01
9.4807	Positive	Positive	Negative	T3	N3	M0	34	Stage IIIC	TCGA-C8-A1HO-01
9.4821	Positive	Positive	Positive	T2	N1	M0	58	Stage IIB	TCGA-C8-A26W-01
9.4825	Negative	Negative	Negative	T1c	N0	MX	67	Stage IA	TCGA-LL-A73Y-01
9.4908	Positive	Positive	Negative	T2	N0 (i-)	M0	58	Stage IIA	TCGA-GM-A2DN-01
9.4914	Positive	Positive	Negative	T2	N2a	M0	49	Stage IIIA	TCGA-AO-A0JG-01
9.4929	Positive	Positive	Negative	T2	N1a	M0	77	Stage IIB	TCGA-EW-A1P5-01
9.4937	Positive	Positive	Negative	T2	N0 (i-)	M0	39	Stage IIA	TCGA-A2-A04V-01
9.4938	Positive	Positive	Negative	T2	N1mi	M0	53	Stage IIB	TCGA-A2-A04Y-01
9.4945	Positive	Positive	Negative	T2	N1	M0	45	Stage IIB	TCGA-HN-A2OB-01
9.4948	Positive	Positive	Negative	T2	N0 (i+)	M0	61	Stage IIA	TCGA-AO-A0J8-01
9.4976	Positive	Positive	Negative	T2	N1mi	M0	45	Stage IIB	TCGA-E2-A1IG-01
9.5018	Negative	Negative	Positive	T2	NX	M0	78	Stage IIA	TCGA-BH-A1EN-01
9.5024	Positive	Positive	Negative	T2	N0	M0	66	Stage IIA	TCGA-A8-A06Y-01
9.5056	Positive	Positive	Negative	T1c	N0	M0	64	Stage I	TCGA-E2-A15F-01
9.5102	Positive	Positive	Negative	T1c	N0	M0	56	Stage I	TCGA-BH-A0B0-01
9.5138	Positive	Positive	Negative	T2	N0 (i-)	M0	58	Stage IIA	TCGA-C8-A12N-01
9.518	Positive	Positive	Negative	T2	N1a	M0	54	Stage IIB	TCGA-LD-A7W6-01
9.5192	Negative	Negative	Negative	T1c	N1a	M0	62	Stage IIA	TCGA-A2-A0ST-01
9.5195	Negative	Negative	Positive	T1c	N0	M0	46	Stage I	TCGA-A2-A3XZ-01
9.5199	Positive	Negative	Negative	T2	N1a	M0	40	Stage IIB	TCGA-A7-A4SA-01
9.5219	Positive	Positive	Positive	T2	N0	M0	66	Stage IIA	TCGA-A8-A08H-01
9.5238	Positive	Negative	Negative	T2	N0	M0	66	Stage IIA	TCGA-A2-A4S1-01
9.5244	Positive	Positive	Negative	T2	N1	MX	45	Stage IIB	TCGA-A1-A0SQ-01
9.5268	Positive	Positive	Positive	T2	N0	M0	62	Stage IIA	TCGA-AR-A1AT-01
9.5279	Negative	Positive	Negative	T2	N2	M0	63	Stage IIIA	TCGA-AN-A0XS-01
9.5286	Positive	Positive	Negative	T2	N3a	M0	54	Stage IIIC	TCGA-D8-A3Z5-01
9.5298	Negative	Negative	Positive	T3	N0	M0	55	Stage IIIC	TCGA-A2-A0T1-01
9.5298	Positive	Positive	Negative	T2	N3	M0	65	Stage IIA	TCGA-AR-A1AW-01
9.5323	Positive	Positive	Negative	T2	N1a	M0	58	Stage IIA	TCGA-E2-A15K-01
9.5338	Positive	Positive	Negative	T1c	N1a	M0	57	Stage IIA	TCGA-GM-A2DC-01
9.5359	Positive	Positive	Positive	T2	N1	M0	53	Stage IIB	TCGA-E2-A14V-01
9.5383	Negative	Positive	Negative	T2	N0 (i-)	M0	46	Stage IIA	TCGA-A7-A13D-01
9.5399	Negative	Negative	Positive	T2	N3a	M0	80	Stage IIIC	TCGA-A8-A07R-01
9.5422	Positive	Negative	Negative	T1c	N0 (i-)	M0	63	Stage IA	TCGA-A7-A0DC-01
9.5423	Positive	Positive	Negative	T1	N0 (i-)	M0	54	Stage IA	TCGA-A2-A0EO-01
9.5424	Positive	Positive	Negative	T2	N1b	M0	88	Stage IIA	TCGA-BH-A18N-01
9.5439	Positive	Positive	Negative	T2	N0 (i-)	MX	56	Stage IIA	TCGA-LL-A442-01
9.5444	Negative	Negative	Negative	T2	N1	M0	36	Stage IIB	TCGA-AR-A0U1-01
9.5469	Positive	Positive	Positive	T4b	N0	M0	55	Stage IIIB	TCGA-D8-A27W-01
9.5475	Positive	Positive	Negative	T2	N1	M0	46	Stage IIB	TCGA-AR-A2LO-01
9.5479	Positive	Negative	Negative	T2	N0 (i+)	M0	62	Stage IIA	TCGA-A7-A3IZ-01
9.548	Positive	Positive	Negative	T2	N0	M0	62	Stage IIB	TCGA-AO-A0JJ-01
9.548	Positive	Positive	Negative	T2	N1a	M0	54	Stage IIA	TCGA-E9-A1NG-01
9.5504	Positive	Positive	Negative	T2	N1a	M0	58	Stage IIB	TCGA-A8-A082-01
9.5518	Positive	Positive	Negative	T1c	N1	M0	68	Stage IIA	TCGA-A8-A09K-01
9.553	Positive	Positive	Negative	T1c	N0	M0	79	Stage I	TCGA-BH-A18S-01
9.5531	Positive	Positive	Negative	T1c	N0	M0	73	Stage IA	TCGA-D8-A1JP-01
9.5552	Positive	Positive	Negative	T2	N1a	M0	61	Stage IIB	TCGA-A1-A0SG-01
9.5597	Negative	Positive	Negative	T2	N0	M0	61	Stage IIA	TCGA-BH-A6R9-01
9.5606	Positive	Positive	Negative	T4b	N2	M1	56	Stage IV	TCGA-BH-A18J-01
9.5609	Positive	Positive	Negative	T2	N0	M0	75	Stage IIA	TCGA-D8-A27G-01
9.562	Negative	Negative	Negative	T2	N0	MX	58	Stage IIA	TCGA-EW-A1OW-01
9.5637	Positive	Positive	Negative	T1c	N0	M0	76	Stage I	TCGA-BH-A0BP-01
9.5638	Positive	Positive	Negative	T2	N1	M0	47	Stage IIB	TCGA-A8-A09D-01
9.5644	Positive	Positive	Negative	T2	N0 (i-)	M0	72	Stage IIA	TCGA-AO-A125-01
9.5649	Positive	Positive	Negative	T1b	N0	M0	32	Stage IA	TCGA-AN-A0FF-01
9.5652	Positive	Positive	Negative	T2	N0	M0	45	Stage IIA	TCGA-D8-A1XF-01
9.5669	Positive	Positive	Negative	T2	N1a	M0	56	Stage IIB	TCGA-BH-A0HL-01
9.5672	Positive	Positive	Negative	T2	N0 (i+)	M0	75	Stage IIA	TCGA-AO-A12G-01
9.5682	Negative	Negative	Negative	T3	N3	M0	55	Stage III	TCGA-AR-A2LH-01
9.5687	Positive	Positive	Negative	T1c	N0	M0	59	Stage I	TCGA-BH-A0BR-01
9.5702	Positive	Positive	Negative	T3	N0	M0	70	Stage IIB	TCGA-AR-A2LL-01
9.5708	Negative	Negative	Negative	T2	N1a	MX	55	Stage IIB	TCGA-D8-A1XK-01
9.5713	Positive	Positive	Negative	T2	N1a	M0	78	Stage IIB	TCGA-BH-A0BV-01
9.5722	Negative	Negative	Negative	T2	N0	M0	54	Stage IIA	TCGA-AR-A0U4-01
9.575	Positive	Positive	Negative	T2	NX	M1	76	Stage IV	TCGA-A8-A07W-01
9.5756	Positive	Positive	Negative	T2	N1b	M0	67	Stage IIB	TCGA-B6-A0WV-01
9.5761	Positive	Positive	Negative	T4	N1a	M0	71	Stage IIIB	TCGA-B6-A0RO-01
9.5772	Positive	Positive	Negative	T1c	N1mi	M0	37	Stage IB	TCGA-A2-A0T3-01
9.5775	Positive	Negative	Negative	T2	N0 (i-)	M0	64	Stage IIA	TCGA-E2-A109-01
9.5814	Positive	Positive	Positive	T2	N1	M0	65	Stage IIB	TCGA-A8-A097-01
9.5815	Negative	Negative	Negative	T2	N2	M0	55	Stage IIIA	TCGA-E2-A14X-01
9.5822	Positive	Positive	Negative	T4b	N1a	M0	73	Stage IIIB	TCGA-BH-A1FR-01
9.5841	Positive	Positive	Negative	T2	N1mi	M0	59	Stage IIB	TCGA-A2-A0YC-01
9.5843	Positive	Negative	Negative	T3	N1a	MX	76	Stage IIIA	TCGA-AC-A2QI-01
9.5856	Positive	Positive	Negative	T2	N0	M0	62	Stage IIA	TCGA-BH-A0DE-01
9.5869	Positive	Positive	Negative	T3	N0	M0	67	Stage IIB	TCGA-A8-A083-01
9.5882	Positive	Positive	Negative	T2	N0	M0	66	Stage IIA	TCGA-A8-A0A2-01
9.5902	Positive	Positive	Negative	T2	N2a	M0	58	Stage IIIA	TCGA-A2-A0ET-01
9.5907	Negative	Negative	Negative	T3	N1a	M0	61	Stage IIIA	TCGA-EW-A3U0-01
9.5921	Positive	Positive	Negative	T3a	N3	M0	50	Stage IIIC	TCGA-BH-A28O-01
9.5976	Negative	Negative	Negative	T2	N1mi	MX	56	Stage IIB	TCGA-EW-A1OV-01
9.6011	Positive	Positive	Negative	T2	N0	MX	90	Stage X	TCGA-B6-A0IC-01
9.6011	Positive	Positive	Negative	T2	NX	MX	43	Stage IIA	TCGA-EW-A1OX-01
9.6014	Positive	Positive	Negative	T3	N1a	MX	80	Stage IIIA	TCGA-D8-A1Y1-01
9.602	Positive	Positive	Negative	T3	N1	M0	52	Stage IIIA	TCGA-AR-A1AM-01
9.6059	Negative	Negative	Negative	T1	N0 (i-)	M0	48	Stage IA	TCGA-A2-A04Q-01
9.6119	Negative	Positive	Negative	T2	N2a	M0	66	Stage IIIA	TCGA-A8-A07U-01
9.6128	Positive	Positive	Negative	T1c	N0	M0	63	Stage I	TCGA-B6-A1KI-01
9.6167	Positive	Positive	Negative	T1c	N0	M0	66	Stage IA	TCGA-D8-A27E-01
9.6171	Positive	Positive	Negative	T2	N1	M0	71	Stage IIB	TCGA-S3-A6ZG-01
9.6185	Positive	Positive	Negative	T2	N0	M0	60	Stage IIA	TCGA-E9-A1NF-01
9.6219	Positive	Positive	Positive	T2	N0	M0	41	Stage IIA	TCGA-A8-A08G-01
9.6221	Positive	Positive	Negative	T2	N0	M0	80	Stage IIA	TCGA-A8-A0A9-01
9.6226	Negative	Negative	Negative	T3	N0	M0	55	Stage IIA	TCGA-AN-A0AR-01
9.6226	Negative	Negative	Positive	T2	N0 (i-)	M0	68	Stage IIB	TCGA-BH-A0EE-01
9.6234	Positive	Positive	Negative	T3	N1mi	M0	47	Stage IIIA	TCGA-A2-A3KD-01
9.6244	Positive	Negative	Negative	T2	N0	M0	75	Stage IIA	TCGA-A8-A094-01
9.6245	Positive	Positive	Negative	T1c	N0	M0	65	Stage I	TCGA-E2-A14S-01
9.6248	Positive	Positive	Negative	T2	N1b	M0	61	Stage IIB	TCGA-B6-A0X5-01
9.6252	Positive	Positive	Positive	T2	N2a	MX	61	Stage IIIA	TCGA-AQ-A04H-01
9.627	Positive	Negative	Negative	T3	N1a	MX	79	Stage IIIA	TCGA-D8-A73W-01
9.629	Positive	Positive	Negative	T2	N0 (i+)	M0	66	Stage IIA	TCGA-A2-A0SU-01
9.6291	Positive	Positive	Negative	T1	N0	M0	66	Stage I	TCGA-A7-A0CD-01
9.6296	Positive	Positive	Negative	T2	N0 (i+)	M0	73	Stage IIA	TCGA-A2-A0CU-01
9.6316	Positive	Negative	Negative	T3	N3a	M0	79	Stage IIIC	TCGA-LD-A74U-01
9.6329	Positive	Positive	Negative	T1c	N0 (i-)	M0	78	Stage IA	TCGA-BH-A0HI-01
9.6358	Positive	Positive	Negative	T2	N0 (i+)	M0	70	Stage IIA	TCGA-A2-A0EN-01
9.6386	Positive	Positive	Positive	T4b	N3a	MX	76	Stage X	TCGA-A8-A099-01
9.6399	Negative	Negative	Negative	T1c	N0	M0	48	Stage IA	TCGA-E2-A573-01
9.64	Positive	Positive	Negative	T3	N1a	cM0 (i+)	47	Stage IIIA	TCGA-BH-A0AZ-01
9.6402	Positive	Positive	Negative	T3	N0 (i+)	M0	51	Stage IIB	TCGA-AO-A12E-01
9.6413	Negative	Negative	Positive	T2	N2a	M0	53	Stage IIIA	TCGA-AO-A0JE-01
9.6428	Positive	Positive	Negative	T1c	N0	M0	68	Stage I	TCGA-BH-A1FD-01
9.6437	Positive	Positive	Negative	T2	N0	M0	68	Stage IIA	TCGA-AN-A046-01
9.6458	Negative	Negative	Negative	T2	N1	M0	75	Stage IIB	TCGA-E9-A1ND-01
9.6511	Positive	Positive	Positive	T2	N0	M0	38	Stage IIA	TCGA-E9-A22D-01
9.6523	Negative	Positive	Negative	T2	N1	M0	61	Stage IIB	TCGA-E9-A1NC-01
9.6533	Negative	Negative	Negative	T2	N0	M0	62	Stage IIA	TCGA-AN-A0AT-01
9.6537	Positive	Positive	Negative	T1c	N0 (i-)	M0	49	Stage I	TCGA-BH-A0W7-01
9.6556	Positive	Positive	Negative	T3	N3a	M0	67	Stage IIIC	TCGA-GM-A4E0-01
9.6578	Positive	Positive	Negative	T1c	N1a	M0	64	Stage IIA	TCGA-E2-A10E-01
9.6592	Positive	Positive	Negative	T1c	N0 (i-)	M0	45	Stage I	TCGA-BH-A0H5-01
9.6596	Negative	Negative	Negative	T2	N1b	M0	48	Stage IIB	TCGA-BH-A18V-06
9.6618	Positive	Positive	Negative	T2	N1a	M0	72	Stage IIB	TCGA-GM-A3NY-01
9.6636	Positive	Positive	Positive	T2	N1	M0	56	Stage IIB	TCGA-C8-A132-01
9.6656	Positive	Positive	Negative	T2	N2	M0	36	Stage IIIA	TCGA-AN-A0XW-01
9.6657	Positive	Positive	Negative	T1c	N0 (i-)	M0	61	Stage IA	TCGA-BH-A0HU-01
9.6657	Positive	Positive	Negative	T2	N1	M0	52	Stage IIB	TCGA-E2-A1IE-01
9.6665	Positive	Positive	Negative	T2	N0	M0	67	Stage IIA	TCGA-S3-AA11-01
9.6666	Positive	Positive	Negative	T2	N1	MX	79	Stage IIB	TCGA-AC-A62Y-01
9.6671	Positive	Negative	Positive	T3	N1	M0	27	Stage IIIA	TCGA-AR-A0TQ-01
9.6699	Negative	Negative	Negative	T3	N0	M0	74	Stage IIB	TCGA-D8-A142-01
9.67	Negative	Negative	Negative	T3	N3	M1	66	Stage IV	TCGA-A2-A0T2-01
9.6738	Positive	Positive	Negative	T3	N1mi	M0	56	Stage IIIA	TCGA-A7-A4SB-01
9.6746	Positive	Positive	Positive	T2	N1	M0	63	Stage IIB	TCGA-AN-A0FT-01
9.6759	Positive	Positive	Positive	T2	N1a	M0	43	Stage IIB	TCGA-BH-A0DZ-01
9.6767	Positive	Positive	Positive	T3	N1	M0	62	Stage IIIA	TCGA-A2-A0SY-01
9.6793	Positive	Positive	Negative	T1c	N2a	MX	46	Stage IIIA	TCGA-XX-A899-01
9.68	Positive	Positive	Negative	T2	N1a	MX	87	Stage IIB	TCGA-AC-A3HN-01
9.6816	Positive	Positive	Negative	T2	N1a	M0	67	Stage IIB	TCGA-E2-A10B-01
9.6839	Positive	Positive	Positive	T2	N1a	M0	42	Stage IIB	TCGA-AO-A12C-01
9.6844	Positive	Positive	Negative	T3	N0 (i+)	M0	46	Stage IIB	TCGA-A2-A0EX-01
9.6847	Positive	Positive	Negative	T1c	N0 (i-)	M0	31	Stage I	TCGA-BH-A0HA-01
9.6853	Positive	Negative	Negative	T2	N1a	M0	54	Stage IIB	TCGA-BH-A0BM-01
9.6892	Positive	Positive	Negative	T1	N0	M0	80	Stage I	TCGA-AR-A1AP-01
9.6899	Positive	Positive	Negative	T1c	N0	M0	74	Stage I	TCGA-E2-A14U-01
9.6949	Positive	Positive	Negative	T1c	N0	MX	51	Stage IA	TCGA-OL-A5RX-01
9.6954	Positive	Positive	Negative	T2	N3a	M0	49	Stage IIIC	TCGA-A2-A4RW-01
9.6965	Positive	Negative	Negative	T1c	N2a	MX	81	Stage IIIA	TCGA-D8-A1XZ-01
9.6981	Positive	Positive	Positive	T3	N1a	M0	75	Stage IIIA	TCGA-A8-A06T-01
9.6988	Negative	Negative	Positive	T2	N1	M0	34	Stage IIB	TCGA-C8-A137-01
9.6989	Negative	Negative	Negative	T1c	N0 (i-)	M0	48	Stage IA	TCGA-A2-A0SX-01
9.6993	Negative	Negative	Positive	T2	N1	M0	55	Stage IIB	TCGA-C8-A12P-01
9.7007	Positive	Positive	Negative	T2	N1b	M0	62	Stage IIB	TCGA-B6-A0X4-01
9.7011	Positive	Positive	Negative	T1c	N1a	MX	54	Stage IIA	TCGA-D8-A1JI-01
9.7012	Positive	Positive	Negative	T1c	N0	M0	51	Stage I	TCGA-E2-A15J-01
9.7045	Positive	Positive	Negative	T2	N1b	M0	67	Stage IIB	TCGA-AO-A0J3-01
9.7051	Negative	Negative	Negative	T2	N0 (i-)	M0	36	Stage IIA	TCGA-AO-A12F-01
9.7099	Negative	Negative	Negative	T1c	N0 (i-)	M0	60	Stage IA	TCGA-B6-A0RN-01
9.7102	Negative	Negative	Positive	T2	N1	M0	51	Stage IIB	TCGA-AN-A04C-01
9.7122	Positive	Positive	Negative	T3	N2a	MX	80	Stage IIIA	TCGA-D8-A1X6-01
9.715	Positive	Positive	Negative	T3	N3a	MX	50	Stage IIIC	TCGA-A7-A426-01
9.7156	Negative	Negative	Negative	T2	N0 (i+)	M0	45	Stage IIA	TCGA-A2-A0D2-01
9.7179	Positive	Positive	Negative	T1c	N0 (i-)	M0	79	Stage IA	TCGA-A2-A0EU-01
9.7184	Negative	Positive	Positive	T2	N0	M0	48	Stage IIA	TCGA-C8-A1HF-01
9.7209	Positive	Negative	Negative	T1	N0 (i+)	M0	56	Stage I	TCGA-A2-A0EP-01
9.7248	Positive	Positive	Negative	T1c	NX	M0	89	Stage I	TCGA-E2-A15O-01
9.7253	Positive	Negative	Negative	T2	N3	MX	51	Stage IIIC	TCGA-E9-A1R2-01
9.7269	Negative	Negative	Positive	T2	N2	M0	59	Stage IIIA	TCGA-C8-A8HP-01
9.7316	Positive	Positive	Negative	T1c	N0	M0	71	Stage I	TCGA-A7-A3IY-01
9.7317	Positive	Positive	Positive	T2	N2a	M0	70	Stage IIIA	TCGA-A8-A08P-01
9.7325	Positive	Negative	Positive	T2	N0	M0	54	Stage IIA	TCGA-A7-A4SF-01
9.736	Positive	Negative	Negative	T2	N0	M0	30	Stage IIA	TCGA-BH-A0DG-01
9.7362	Positive	Positive	Negative	T1b	N0	M0	62	Stage I	TCGA-BH-A0DX-01
9.7389	Positive	Positive	Negative	T2	N1a	M0	54	Stage IIB	TCGA-E2-A10C-01
9.7399	Positive	Positive	Negative	T2	N0	M0	74	Stage IIA	TCGA-AN-A03X-01
9.7404	Positive	Positive	Negative	T2	N0 (i-)	M0	57	Stage IIA	TCGA-GM-A2DM-01
9.7423	Positive	Positive	Negative	T3	N3a	M0	56	Stage IIIC	TCGA-D8-A3Z6-01
9.7478	Positive	Positive	Negative	T1c	N2a	M0	44	Stage IIIA	TCGA-GM-A3XN-01
9.7487	Positive	Positive	Positive	T1c	N0 (i+)	M0	52	Stage IA	TCGA-3C-AALK-01
9.7491	Negative	Negative	Negative	T4	N1	M0	63	Stage IIIB	TCGA-B6-A0IK-01
9.7547	Positive	Positive	Negative	T2	N0	M0	51	Stage IIA	TCGA-E9-A1NI-01
9.7565	Positive	Negative	Negative	T2	N1mi	M0	42	Stage IIB	TCGA-E2-A1IP-01
9.7566	Positive	Negative	Negative	T2	N0	M0	56	Stage IIA	TCGA-AN-A0AM-01
9.757	Positive	Positive	Negative	T1c	N1a	M0	58	Stage IIA	TCGA-BH-A0W3-01
9.7575	Positive	Positive	Positive	T2	N1	M0	49	Stage IIB	TCGA-JL-A3YW-01
9.7581	Positive	Positive	Negative	T2	N0	M0	62	Stage IIA	TCGA-AN-A049-01
9.7592	Positive	Positive	Negative	T2	N0 (i-)	M0	56	Stage IIA	TCGA-A7-A0DB-01
9.7603	Positive	Positive	Negative	T4b	N1a	M0	58	Stage IIIB	TCGA-A8-A09B-01
9.7641	Positive	Positive	Negative	T2	N1	M0	77	Stage IIB	TCGA-E2-A2P6-01
9.7652	Negative	Negative	Negative	T2	N0 (i-)	M0	61	Stage IIA	TCGA-AO-A128-01
9.7655	Positive	Negative	Positive	T2	N1a	M0	49	Stage IIB	TCGA-LL-A5YP-01
9.767	Positive	Positive	Positive	T3	N0	M0	79	Stage IIB	TCGA-AN-A0AJ-01
9.7749	Positive	Positive	Negative	T1c	N0 (i-)	M0	50	Stage I	TCGA-GM-A2DL-01
9.7751	Positive	Positive	Negative	T1c	N0	MX	80	Stage I	TCGA-OL-A66J-01
9.7755	Positive	Negative	Negative	T1c	N1	M0	56	Stage IIA	TCGA-AO-A0JI-01
9.7762	Positive	Positive	Negative	T1c	N1mi	M0	47	Stage IB	TCGA-E2-A570-01
9.7768	Positive	Positive	Negative	T1c	N0	MX	63	Stage IA	TCGA-A7-A3J1-01
9.7775	Negative	Negative	Negative	T2	N1a	cM0 (i+)	51	Stage IIB	TCGA-S3-AA15-01
9.7826	Negative	Negative	Negative	T2	N0 (i-)	M0	38	Stage IIA	TCGA-B6-A0RS-01
9.7864	Positive	Positive	Negative	T1c	N1a	M0	48	Stage IIA	TCGA-BH-A0HO-01
9.7868	Positive	Positive	Negative	T3	N0	M0	85	Stage IIB	TCGA-A2-A0CO-01
9.7885	Positive	Positive	Negative	T3	N3a	MX	29	Stage IIIC	TCGA-S3-A6ZH-01
9.7903	Positive	Positive	Negative	T3	N1	M0	90	Stage IIIA	TCGA-AC-A3W6-01
9.7903	Positive	Positive	Negative	T3	N1	MX	50	Stage IIIA	TCGA-AR-A0TW-01
9.7939	Negative	Negative	Negative	T3	N3a	M0	38	Stage IIIC	TCGA-BH-A0E0-01
9.7969	Negative	Negative	Negative	T2	N1	M0	37	Stage IIB	TCGA-E2-A14N-01
9.798	Positive	Positive	Negative	T2	N0	M0	52	Stage IIA	TCGA-E2-A14T-01
9.7981	Positive	Positive	Negative	T2	N0	M0	50	Stage IIA	TCGA-C8-A1HG-01
9.7988	Positive	Positive	Positive	T2	N3	M0	68	Stage IIIC	TCGA-AR-A5QN-01
9.7989	Negative	Negative	Negative	T2	N0	M0	70	Stage IIA	TCGA-BH-A18T-01
9.7994	Positive	Positive	Negative	T2	N2a	M0	71	Stage IIIA	TCGA-BH-A0DS-01
9.8059	Positive	Positive	Negative	T2	N3a	M0	75	Stage IIIC	TCGA-A8-A09M-01
9.8071	Positive	Positive	Negative	T2	N0 (i-)	M0	45	Stage IIA	TCGA-BH-A2L8-01
9.8095	Positive	Positive	Negative	T3	N2a	M0	61	Stage IIIA	TCGA-A2-A1FX-01
9.8113	Positive	Positive	Negative	T2	N0	MX	61	Stage IIA	TCGA-OL-A5DA-01
9.8121	Positive	Positive	Negative	T2	N1	M0	52	Stage IIB	TCGA-BH-A0E1-01
9.8144	Negative	Negative	Negative	T2	N3c	M0	36	Stage IIIC	TCGA-A2-A04P-01
9.8179	Positive	Negative	Positive	T2	N1mi	M0	48	Stage IIB	TCGA-BH-A0C7-01
9.8182	Positive	Negative	Negative	T2	N1mi	MX	41	Stage IIB	TCGA-EW-A2FS-01
9.8191	Positive	Positive	Negative	T2	N3a	M0	59	Stage IIIC	TCGA-A8-A08F-01
9.8193	Positive	Positive	Negative	T3	N2	M0	42	Stage IIIA	TCGA-B6-A0RV-01
9.8196	Positive	Positive	Negative	T1c	N0	M0	64	Stage IA	TCGA-D8-A1XA-01
9.8207	Positive	Positive	Negative	T3	N1a	M0	59	Stage IIIA	TCGA-BH-A0BZ-01
9.8222	Positive	Positive	Negative	T2	N0 (i+)	M0	56	Stage IIA	TCGA-BH-A0HQ-01
9.8231	Positive	Positive	Negative	T1c	N0 (i-)	M0	60	Stage IA	TCGA-A2-A0CP-01
9.8247	Positive	Positive	Negative	T2	N1mi	M0	65	Stage IIB	TCGA-GM-A5PX-01
9.8258	Negative	Negative	Negative	T2	N0	M0	49	Stage IIA	TCGA-A2-A3XX-01
9.8267	Positive	Positive	Negative	T2	N0	M0	61	Stage IIA	TCGA-A8-A093-01
9.8268	Positive	Positive	Negative	T1c	N1	MX	63	Stage IIA	TCGA-OL-A5RU-01
9.8291	Negative	Negative	Negative	T2	N0	M0	51	Stage IIA	TCGA-A7-A6VV-01
9.8295	Positive	Negative	Negative	T4	N1a	M1	48	Stage IV	TCGA-AO-A0J5-01
9.8303	Positive	Positive	Negative	T2	N1mi	MX	68	Stage IIB	TCGA-AC-A3OD-01
9.8333	Positive	Positive	Positive	T2	N0 (i-)	M0	34	Stage IIA	TCGA-A2-A04X-01
9.8366	Positive	Positive	Positive	T2	N2a	M0	36	Stage IIIA	TCGA-D8-A27N-01
9.8377	Positive	Negative	Negative	T1	N0 (i+)	cM0 (i+)	55	Stage IIIA	TCGA-AN-A0XR-01
9.8377	Positive	Positive	Positive	T2	N2	M0	47	Stage I	TCGA-S3-AA14-01
9.8382	Positive	Positive	Negative	TX	NX	MX	55	Stage X	TCGA-3C-AAAU-01
9.8389	Positive	Positive	Negative	T2	N1b	MX	58	Stage X	TCGA-B6-A0WW-01
9.846	Positive	Positive	Negative	T2	N0	M0	46	Stage IIA	TCGA-AR-A1AN-01
9.8475	Positive	Positive	Negative	T2	N0	MX	74	Stage IIA	TCGA-AC-A5XS-01
9.849	Positive	Negative	Positive	T2b	N1	M0	50	Stage IIA	TCGA-BH-A18R-01
9.8532	Positive	Negative	Negative	T2	N2	M1	82	Stage IV	TCGA-A2-A0SW-01
9.8584	Positive	Positive	Negative	T1c	N0	M0	39	Stage I	TCGA-BH-A0BQ-01
9.8607	Positive	Positive	Negative	T1c	N0 (i-)	M0	54	Stage IA	TCGA-B6-A0X0-01
9.8609	Negative	Negative	Negative	T3	N0 (i-)	M0	26	Stage IIB	TCGA-B6-A0RG-01
9.8637	Positive	Positive	Negative	T2	N0 (i-)	M0	62	Stage IIA	TCGA-A2-A0T4-01
9.8642	Positive	Positive	Negative	TX	NX	MX	57	Stage X	TCGA-B6-A0RM-01
9.8664	Positive	Positive	Positive	T2	N0	M0	78	Stage IIA	TCGA-E2-A14W-01
9.8743	Negative	Negative	Negative	T2	N0	M0	52	Stage IIA	TCGA-C8-A134-01
9.8789	Negative	Positive	Negative	T2	N0	M0	90	Stage IIA	TCGA-D8-A1JK-01
9.8843	Negative	Negative	Negative	T2	N0	M0	47	Stage IIA	TCGA-E9-A22G-01
9.8912	Positive	Negative	Negative	T3	N0	M0	83	Stage IIB	TCGA-A8-A09Z-01
9.8927	Negative	Negative	Negative	T2	N3a	M0	62	Stage IIIC	TCGA-A8-A09X-01
9.8943	Negative	Negative	Negative	T1c	N1mi	MX	36	Stage IIA	TCGA-OL-A66I-01
9.8949	Positive	Negative	Positive	T1c	N1	MX	52	Stage IIA	TCGA-OL-A5RY-01
9.8969	Positive	Positive	Negative	T3	N2	M0	62	Stage IIIA	TCGA-A2-A4S2-01
9.8969	Negative	Negative	Negative	T3	N2a	MX	73	Stage IIIA	TCGA-E2-A1LL-01
9.8981	Positive	Positive	Negative	T2	N0 (i-)	M0	69	Stage IIA	TCGA-BH-A0H9-01
9.9044	Positive	Positive	Negative	T3	N0	M0	77	Stage IIA	TCGA-A2-A4S0-01
9.9044	Positive	Positive	Negative	T2	N1a	M0	53	Stage IIIA	TCGA-BH-AB28-01
9.9069	Positive	Negative	Negative	T2	N0 (i-)	M0	71	Stage IIA	TCGA-A2-A0CT-01
9.9073	Negative	Negative	Negative	T2	N0	M0	62	Stage IIA	TCGA-E2-A14R-01
9.9074	Positive	Positive	Negative	T2	N1	M0	46	Stage IIB	TCGA-C8-A12U-01
9.9093	Positive	Positive	Negative	T2a	N0 (i-)	MX	66	Stage IIA	TCGA-W8-A86G-01
9.9098	Negative	Negative	Negative	T2	N0 (i-)	M0	40	Stage IIA	TCGA-A1-A0SP-01
9.9123	Positive	Positive	Negative	T2	N1a	M0	41	Stage IIB	TCGA-BH-A0BJ-01
9.9124	Positive	Negative	Negative	T1c	N0	M0	71	Stage IA	TCGA-E9-A22B-01
9.9137	Positive	Positive	Negative	T1c	N0	M0	46	Stage I	TCGA-Z7-A8R6-01
9.9181	Positive	Negative	Negative	T2	N1b	MX	55	Stage IIB	TCGA-EW-A1P0-01
9.9204	Positive	Positive	Negative	T3	N0 (i-)	MX	66	Stage IIB	TCGA-EW-A1PC-01
9.9243	Negative	Negative	Negative	T2	N0	M0	51	Stage IIA	TCGA-AQ-A54N-01
9.9256	Positive	Positive	Negative	T3	N1a	M0	76	Stage IIIA	TCGA-E2-A14O-01
9.9274	Negative	Negative	Negative	T3	N2a	M0	39	Stage IIIA	TCGA-A2-A0YJ-01
9.9286	Positive	Positive	Negative	T2	N0	M0	41	Stage IIIC	TCGA-E2-A15A-01
9.9286	Positive	Positive	Negative	T2	N3a	M0	45	Stage IIA	TCGA-PE-A5DE-01
9.9301	Positive	Positive	Negative	T1c	N0	M0	60	Stage I	TCGA-A8-A06O-01
9.9303	Positive	Positive	Positive	T2	N0	M0	43	Stage IIA	TCGA-C8-A12T-01
9.9312	Positive	Positive	Positive	T1c	N1	MX	76	Stage IIA	TCGA-AC-A23G-01
9.9315	Positive	Positive	Negative	T3	N1a	MX	73	Stage IIIA	TCGA-LQ-A4E4-01
9.9348	Negative	Negative	Negative	T2	N0 (i-)	M0	60	Stage IIA	TCGA-A2-A0D0-01
9.9402	Positive	Positive	Negative	T2	N0	MX	72	Stage IIA	TCGA-OL-A66K-01
9.9412	Negative	Negative	Negative	T3	N0	MX	58	Stage IIB	TCGA-GI-A2C9-01
9.9417	Positive	Positive	Negative	T2	N0 (i-)	M0	49	Stage IIA	TCGA-BH-A0DK-01
9.9435	Positive	Positive	Negative	T2	N0 (i-)	M0	39	Stage IIA	TCGA-A2-A0T5-01
9.9449	Positive	Positive	Positive	T1c	N1	MX	50	Stage IIA	TCGA-A1-A0SN-01
9.9462	Positive	Negative	Negative	T2	N0	M0	54	Stage IIA	TCGA-AR-A0TY-01
9.9486	Positive	Positive	Negative	T2	N0	M0	53	Stage IIA	TCGA-E2-A1BD-01
9.9515	Positive	Positive	Negative	T3	N2	M0	34	Stage IIIA	TCGA-AO-A03L-01
9.9517	Positive	Positive	Negative	T4	N0	M0	88	Stage IIIB	TCGA-AN-A0FK-01
9.9554	Positive	Positive	Negative	T1b	N0 (i-)	M0	64	Stage I	TCGA-BH-A0B8-01
9.9581	Positive	Positive	Negative	T1a	N0	M0	43	Stage I	TCGA-BH-A0B2-01
9.9596	Negative	Negative	Negative	T2	N2	M0	82	Stage IIIA	TCGA-C8-A131-01
9.9625	Positive	Positive	Negative	T2	N0 (i-)	M0	57	Stage IIA	TCGA-A7-A0CJ-01
9.9632	Positive	Positive	Negative	T2	N0	MX	48	Stage IIA	TCGA-EW-A1P3-01
9.9683	Positive	Positive	Negative	T2	N1a	M0	63	Stage IIB	TCGA-BH-A0DH-01
9.9725	Positive	Negative	Positive	T2	N1a	M0	62	Stage IIB	TCGA-A2-A0EY-01
9.973	Negative	Negative	Negative	TX	N1b	M0	38	Stage Tis	TCGA-B6-A0IE-01
9.9748	Negative	Negative	Negative	T1c	N0 (i-)	MX	61	Stage IA	TCGA-LL-A740-01
9.9768	Positive	Positive	Negative	T2	N3a	M0	55	Stage IIIC	TCGA-B6-A408-01
9.9787	Negative	Negative	Negative	T1c	N1mi	M0	43	Stage IIA	TCGA-E2-A158-01
9.98	Negative	Negative	Negative	T2	N0	M0	52	Stage IIA	TCGA-AN-A0FX-01
9.9803	Positive	Negative	Negative	T3	N0	MX	60	Stage IIB	TCGA-EW-A3E8-01
9.9811	Positive	Positive	Positive	T2	N1	M0	68	Stage IIB	TCGA-A8-A07P-01
9.9827	Positive	Positive	Negative	T1c	N0	M0	64	Stage I	TCGA-E2-A14Z-01
9.9841	Positive	Positive	Negative	T4b	N3	M0	69	Stage IIIB	TCGA-A8-A079-01
9.9848	Negative	Negative	Negative	T3	N0	M0	65	Stage IIB	TCGA-E9-A5FL-01
9.9866	Positive	Positive	Negative	T2	N1	M0	44	Stage IIB	TCGA-MS-A51U-01
9.988	Positive	Positive	Negative	T3	N3	M1	64	Stage IV	TCGA-B6-A0IB-01
9.9894	Positive	Positive	Negative	T3	N1a	M0	59	Stage IIIA	TCGA-AO-A0JD-01
9.9904	Positive	Positive	Negative	T1c	N2a	M0	74	Stage IIIA	TCGA-E2-A1B4-01
9.9912	Positive	Positive	Negative	T1c	NX	MX	58	Stage X	TCGA-B6-A0WS-01
9.9984	Positive	Positive	Negative	T1b	N0 (i-)	M0	85	Stage IA	TCGA-E9-A54X-01
10.0037	Positive	Positive	Positive	T1c	N0	M0	68	Stage IA	TCGA-C8-A3M8-01
10.0046	Positive	Positive	Negative	T3	N2a	M0	60	Stage IIIA	TCGA-A2-A0CK-01
10.0083	Negative	Negative	Positive	T1c	N0	M0	73	Stage IA	TCGA-LD-A9QF-01
10.0115	Positive	Positive	Negative	T3	N0 (i-)	M0	42	Stage IIB	TCGA-B6-A0IJ-01
10.0135	Negative	Negative	Negative	T2	N2	M0	40	Stage IIIA	TCGA-E2-A1L7-01
10.0165	Positive	Negative	Negative	T2	N0	M0	74	Stage IIA	TCGA-E9-A22A-01
10.018	Positive	Positive	Negative	T3	N3a	MX	70	Stage IIIC	TCGA-A7-A425-01
10.0209	Positive	Negative	Positive	T1c	N1a	M0	56	Stage IIA	TCGA-BH-A0AW-01
10.0217	Negative	Negative	Positive	T2	N1mi	M0	50	Stage IIB	TCGA-A2-A04W-01
10.0224	Negative	Negative	Negative	T1	N0	M0	49	Stage I	TCGA-AR-A2LR-01
10.0255	Negative	Negative	Negative	T2	N1a	M0	49	Stage IIB	TCGA-A2-A3XY-01
10.0354	Positive	Positive	Negative	T1c	N0 (i-)	M0	69	Stage I	TCGA-GM-A2D9-01
10.0371	Negative	Negative	Negative	T2	N2a	M0	59	Stage IIIA	TCGA-AO-A0JL-01
10.0405	Positive	Positive	Negative	T1c	N0 (i-)	M0	54	Stage I	TCGA-GM-A2DO-01
10.0419	Positive	Positive	Negative	T2	N3	M0	60	Stage IIIC	TCGA-BH-A0BC-01
10.045	Positive	Positive	Negative	T2	N0 (i-)	M0	69	Stage IIA	TCGA-AO-A12H-01
10.0456	Positive	Positive	Negative	T2	N1a	MX	59	Stage II	TCGA-OK-A5Q2-01
10.0489	Positive	Positive	Negative	T2	N1	M0	53	Stage IIB	TCGA-C8-A8HQ-01
10.0549	Positive	Positive	Positive	T2	N2a	MX	84	Stage IIIA	TCGA-AQ-A1H2-01
10.0658	Positive	Positive	Negative	T2	N1a	MX	43	Stage IIB	TCGA-AC-A6NO-01
10.0672	Positive	Positive	Negative	T2	N0	MX	63	Stage IIA	TCGA-EW-A1OY-01
10.0711	Positive	Positive	Negative	T2	N1a	MX	34	Stage IIB	TCGA-D8-A1XL-01
10.0726	Positive	Negative	Negative	T1c	N0 (i-)	M0	58	Stage I	TCGA-GM-A2DK-01
10.0803	Negative	Negative	Negative	T1b	N0	MX	50	Stage IA	TCGA-LL-A5YO-01
10.0822	Negative	Negative	Negative	T2	N1	M0	67	Stage IIB	TCGA-A1-A0SO-01
10.0862	Negative	Negative	Negative	T2	N0 (i-)	M0	54	Stage IIA	TCGA-A1-A0SK-01
10.0887	Positive	Positive	Negative	T3	N1a	M0	44	Stage IIIA	TCGA-A7-A13F-01
10.0898	Negative	Negative	Negative	T1c	N0	M0	81	Stage IA	TCGA-BH-A18G-01
10.0899	Negative	Negative	Negative	T2	N0	M0	45	Stage IIA	TCGA-AR-A256-01
10.0988	Positive	Positive	Negative	T1c	N0	M0	89	Stage I	TCGA-A8-A08A-01
10.1086	Negative	Negative	Negative	T3	N0	MX	58	Stage IIB	TCGA-AC-A2QH-01
10.1101	Positive	Positive	Negative	T2	N1a	M0	63	Stage IIB	TCGA-GM-A5PV-01
10.1104	Positive	Positive	Negative	T2	N0	M0	54	Stage IIA	TCGA-A1-A0SF-01
10.1156	Positive	Positive	Negative	T1c	N0	M0	74	Stage I	TCGA-E2-A1IF-01
10.1197	Positive	Positive	Negative	T1	N0 (i-)	M0	62	Stage IA	TCGA-A2-A0CQ-01
10.1225	Positive	Positive	Negative	T2	N1mi	cM0 (i+)	64	Stage IIB	TCGA-S3-AA17-01
10.1243	Positive	Positive	Negative	T4b	N2a	M0	83	Stage IIIB	TCGA-A8-A09Q-01
10.1245	Positive	Positive	Negative	T1c	N1a	M0	62	Stage IIA	TCGA-BH-A0GZ-01
10.1257	Positive	Positive	Negative	T2	N0 (i-)	M0	46	Stage IIA	TCGA-A2-A0CZ-01
10.1292	Positive	Positive	Negative	T1c	NX	M1	55	Stage IV	TCGA-LL-A73Z-01
10.1293	Negative	Negative	Negative	T2	N0 (i-)	M0	61	Stage IIA	TCGA-AO-A0J6-01
10.1303	Negative	Negative	Negative	T4d	N2a	MX	51		TCGA-BH-A1F6-01
10.1317	Positive	Positive	Negative	T4b	N3a	M1	73	Stage IV	TCGA-A2-A0CS-01
10.1323	Negative	Negative	Negative	T2	N1a	M0	59	Stage IIB	TCGA-D8-A1JM-01
10.1341	Negative	Negative	Negative	T2	N0	M0	44	Stage IIA	TCGA-E2-A1B6-01
10.1347	Positive	Positive	Negative	T1	N0 (i-)	M0	36	Stage IA	TCGA-A2-A04R-01
10.1354	Positive	Positive	Negative	T2	N1	M0	62	Stage IIB	TCGA-C8-A12X-01
10.1355	Positive	Positive	Negative	T2	N1a	M0	35	Stage IIB	TCGA-BH-A1ES-06
10.1367	Negative	Negative	Negative	T3	N1b	M0	40	Stage IIIA	TCGA-B6-A0WX-01
10.1411	Negative	Negative	Negative	T2	N0 (i-)	M0	59	Stage IIA	TCGA-BH-A0RX-01
10.1432	Positive	Positive	Negative	T2	N0 (i-)	MX	52	Stage IIA	TCGA-EW-A2FW-01
10.1443	Negative	Negative	Negative	T2	N0	M0	49	Stage IIA	TCGA-AR-A1AQ-01
10.1452	Negative	Positive	Negative	T1c	N0	M0	51	Stage I	TCGA-E2-A1II-01
10.1456	Positive	Negative	Positive	T2	N0	M0	64	Stage IIA	TCGA-PE-A5DD-01
10.1535	Positive	Positive	Negative	T2	N1	M0	29	Stage IIB	TCGA-C8-A273-01
10.1547	Negative	Negative	Positive	T4d	N3b	M1	63	Stage IV	TCGA-UU-A93S-01
10.1592	Negative	Negative	Negative	T1c	N1b	M0	78	Stage IIA	TCGA-BH-A1FC-01
10.1624	Negative	Negative	Negative	T2	N0	M0	40	Stage IIA	TCGA-D8-A27F-01
10.1633	Negative	Negative	Negative	T2	N1	M0	58	Stage IIB	TCGA-AN-A04D-01
10.1669	Positive	Positive	Negative	T2	N2a	M1	63	Stage IV	TCGA-A2-A0SV-01
10.1692	Negative	Negative	Negative	T2	N0	M0	51	Stage IIA	TCGA-D8-A143-01
10.1713	Positive	Positive	Negative	T2	N1b	M0	50	Stage IIB	TCGA-B6-A0WZ-01
10.175	Positive	Positive	Negative	T2	N1	M0	71	Stage IIB	TCGA-AO-A0J7-01
10.1812	Positive	Positive	Negative	T3	N2a	MX	46	Stage IIIA	TCGA-AC-A3BB-01
10.183	Positive	Positive	Positive	T2	N2a	M0	72	Stage IIIA	TCGA-PE-A5DC-01
10.191	Positive	Positive	Negative	T1c	N0 (i-)	MX	75	Stage IA	TCGA-AC-A8OR-01
10.1912	Negative	Negative	Positive	T2	N1	M0	41	Stage IIB	TCGA-E2-A1LB-01
10.1941	Positive	Positive	Negative	T1c	N0	M0	59	Stage IIA	TCGA-BH-A6R8-01
10.1941	Positive	Positive	Negative	T2	N1a	M0	46	Stage IIA	TCGA-E2-A1LA-01
10.1948	Positive	Positive	Negative	T1c	N1a	M0	47	Stage IIA	TCGA-B6-A401-01
10.2024	Positive	Positive	Negative	T2	N0	M0	66	Stage IIA	TCGA-AN-A03Y-01
10.2033	Positive	Positive	Positive	T3	N1	MX	51	Stage IIIA	TCGA-EW-A424-01
10.2044	Positive	Positive	Negative	T1c	N1mi	M0	41	Stage IB	TCGA-BH-A42V-01
10.2225	Positive	Positive	Negative	T1b	N0 (i-)	M0	76	Stage I	TCGA-B6-A40B-01
10.2328	Negative	Negative	Negative	TX	N0 (i-)	M0	61	Stage X	TCGA-B6-A0RE-01
10.2361	Negative	Negative	Negative	T2	N1	M0	73	Stage IIB	TCGA-AR-A0U0-01
10.2388	Negative	Negative	Negative	T3	N0	M0	67	Stage IIB	TCGA-OL-A97C-01
10.2443	Positive	Positive	Negative	T3	N0 (i-)	M0	51	Stage IIB	TCGA-B6-A40C-01
10.2459	Positive	Negative	Negative	T2	N0	M0	76	Stage IIA	TCGA-AN-A0AK-01
10.2485	Positive	Positive	Positive	T2	N0 (i-)	M0	71	Stage IIA	TCGA-E9-A295-01
10.2548	Positive	Positive	Negative	T2	N0	M0	58	Stage IIA	TCGA-E9-A1NA-01
10.2602	Positive	Negative	Negative	T1c	N0 (i-)	M0	62	Stage IA	TCGA-BH-A0HW-01
10.2613	Positive	Positive	Negative	T2	N0 (i-)	M0	63	Stage IIA	TCGA-AO-A12B-01
10.2633	Negative	Negative	Negative	T1c	N0	MX	43	Stage IA	TCGA-OL-A6VO-01
10.2721	Positive	Positive	Negative	T1c	N1mi	M0	71	Stage IIA	TCGA-E2-A1IK-01
10.2728	Positive	Positive	Negative	T2	N0	M0	85	Stage IIA	TCGA-A8-A07Z-01
10.273	Positive	Negative	Negative	T3	N2a	M0	89	Stage IIIA	TCGA-A8-A08L-01
10.2807	Negative	Negative	Negative	T1c	N1a	M0	53	Stage IIA	TCGA-GM-A2DF-01
10.2862	Positive	Positive	Positive	T2	N0 (i-)	M0	46	Stage IIA	TCGA-LL-A5YN-01
10.2887	Positive	Positive	Negative	T2	N1a	M0	57	Stage IIB	TCGA-AO-A03R-01
10.2927	Positive	Negative	Negative	T2	N1a	M0	57	Stage IIB	TCGA-A2-A3Y0-01
10.3007	Positive	Positive	Negative	T3	N1a	MX	61	Stage IIIA	TCGA-Z7-A8R5-01
10.3028	Negative	Negative	Negative	T2	N0 (i-)	M0	64	Stage IIA	TCGA-A2-A0EQ-01
10.3058	Positive	Positive	Negative	T2	N0 (i-)	M0	62	Stage IIB	TCGA-AC-A3QP-01
10.3058	Negative	Negative	Negative	T2	N1mi	MX	79	Stage IIA	TCGA-GM-A2DB-01
10.3138	Negative	Negative	Negative	T2	N1a	M0	29	Stage IIB	TCGA-AO-A129-01
10.3155	Positive	Positive	Positive	T2	N2a	M0	72	Stage IIIA	TCGA-BH-A18U-01
10.3162	Negative	Negative	Negative	T1a	N0	MX	80	Stage IA	TCGA-BH-A42U-01
10.3174	Negative	Negative	Negative	T1c	N0 (i+)	M0	62	Stage IIA	TCGA-A2-A04U-01
10.3174	Positive	Positive	Positive	T2	N1a	M0	47	Stage IIA	TCGA-BH-A0C0-01
10.3199	Positive	Negative	Negative	T2	NX	MX	52	Stage IIA	TCGA-5T-A9QA-01
10.3219	Positive	Positive	Negative	T2	N3a	M0	52	Stage IIIC	TCGA-LD-A7W5-01
10.3326	Positive	Positive	Positive	T2	N0 (i-)	M0	51	Stage IIA	TCGA-B6-A0RH-01
10.3353	Positive	Positive	Positive	T2	N1a	M0	70	Stage IIB	TCGA-LL-A7T0-01
10.3417	Positive	Positive	Negative	T2	N1a	M0	69	Stage IIB	TCGA-E2-A56Z-01
10.3478	Positive	Positive	Negative	T2	N0 (i-)	M0	39	Stage IIA	TCGA-AO-A126-01
10.351	Negative	Negative	Negative	T3	N1b	M0	40	Stage IIIA	TCGA-B6-A0IQ-01
10.3534	Positive	Positive	Negative	T3	N1a	M0	46	Stage IIIA	TCGA-GM-A3XG-01
10.3535	Positive	Negative	Positive	T2	N1a	MX	66	Stage IIB	TCGA-OL-A5S0-01
10.3582	Positive	Negative	Negative	T3	N1a	MX	82	Stage IIIA	TCGA-S3-AA12-01
10.3655	Positive	Positive	Negative	T2	N2a	M0	49	Stage IIIA	TCGA-BH-A0E2-01
10.367	Positive	Positive	Positive	T2	N0	MX	65	Stage IIA	TCGA-AC-A3W5-01
10.3743	Negative	Positive	Negative	T2	N0 (i-)	M0	63	Stage IIA	TCGA-GM-A3NW-01
10.3785	Positive	Positive	Negative	T2	N0	M0	62	Stage IIA	TCGA-A7-A3J0-01
10.3819	Negative	Negative	Positive	T2	N3a	M0	71	Stage IIIC	TCGA-E2-A1LE-01
10.3897	Negative	Negative	Negative	T1c	N0	M0	59	Stage I	TCGA-E2-A1LH-01
10.3913	Positive	Positive	Negative	T2	N0 (i-)	M0	61	Stage IIB	TCGA-AO-A03T-01
10.3913	Positive	Negative	Negative	T2	N1a	MX	42	Stage IIA	TCGA-LL-A8F5-01
10.3932	Positive	Positive	Negative	T2	N1mi	MX	44	Stage IIB	TCGA-LD-A66U-01
10.3981	Positive	Positive	Negative	T2	N0	M0	66	Stage IIA	TCGA-AR-A0TV-01
10.3992	Positive	Negative	Positive	T2	N0 (i-)	M0	56	Stage IIA	TCGA-EW-A1OZ-01
10.4166	Positive	Positive	Negative	T2	N1a	M0	59	Stage IIB	TCGA-A2-A4S3-01
10.4169	Negative	Negative	Negative	T1	N1	M0	58	Stage IIA	TCGA-C8-A26X-01
10.4195	Positive	Negative	Negative	T3	N2a	M0	54	Stage IIIA	TCGA-E2-A107-01
10.4198	Positive	Positive	Negative	T2	N0	M0	51	Stage IIA	TCGA-AQ-A54O-01
10.4206	Positive	Positive	Negative	T1b	N0	MX	48	Stage IA	TCGA-OL-A6VR-01
10.4217	Positive	Positive	Negative	T1c	N0 (i+)	M0	87	Stage IA	TCGA-BH-A8FY-01
10.4264	Positive	Positive	Negative	T3	N0	MX	40	Stage IIB	TCGA-OL-A5D8-01
10.4325	Positive	Negative	Negative	T2	N1a	cM0 (i+)	51	Stage IIB	TCGA-BH-A5IZ-01
10.4475	Positive	Positive	Negative	T3	N1	M0	65	Stage IIIA	TCGA-C8-A133-01
10.4487	Positive	Positive	Negative	T1c	N1mi	MX	74	Stage IB	TCGA-OL-A66H-01
10.4562	Negative	Negative	Negative	T3	N1	M0	68	Stage IIIA	TCGA-AR-A5QQ-01
10.4581	Positive	Positive	Positive	T2	N1a	M0	50	Stage IIB	TCGA-3C-AALI-01
10.4627	Positive	Positive	Positive	T2	N0	M0	71	Stage IIA	TCGA-AN-A0FD-01
10.4714	Positive	Negative	Positive	T3	N0	M0	77	Stage IIB	TCGA-A8-A06X-01
10.4789	Positive	Positive	Negative	T1c	N0	M0	77	Stage IA	TCGA-D8-A1JS-01
10.4835	Positive	Negative	Negative	T3	N3	MX	59	Stage IIIC	TCGA-OL-A66N-01
10.4872	Negative	Negative	Negative	T2	N0 (i-)	M0	62	Stage IIA	TCGA-A2-A04T-01
10.4887	Positive	Positive	Negative	T2	NX	MX	90	Stage IIA	TCGA-LL-A6FP-01
10.4914	Positive	Positive	Negative	T1c	N0 (i-)	M0	67	Stage IA	TCGA-BH-A0HN-01
10.4938	Positive	Positive	Negative	T2	N3a	M0	45	Stage IIIC	TCGA-E2-A15A-06
10.5001	Negative	Negative	Negative	T2	N0 (i-)	M0	57	Stage IIA	TCGA-A7-A0CE-01
10.5019	Positive	Positive	Positive	T2	N0	M0	46	Stage IIA	TCGA-JL-A3YX-01
10.5098	Positive	Positive	Positive	T3	N0	MX	75	Stage IIB	TCGA-AC-A3TN-01
10.511	Positive	Positive	Negative	T3	N1a	M0	50	Stage IIIA	TCGA-AO-A0JB-01
10.5368	Positive	Positive	Negative	T2	N2a	MX	53	Stage IIIA	TCGA-EW-A1IZ-01
10.5481	Positive	Positive	Positive	T4b	N1a	M0	73	Stage IIIB	TCGA-A8-A09E-01
10.5588	Positive	Positive	Negative	T1c	N0	M0	55	Stage IA	TCGA-BH-A0HB-01
10.5588	Negative	Negative	Negative	T2	N0 (i-)	MX	71	Stage IIA	TCGA-OL-A5D6-01
10.564	Negative	Negative	Positive	T2	N0 (i-)	M0	76	Stage IIA	TCGA-A2-A0D1-01
10.5699	Negative	Negative	Negative	T2	N0	M0	51	Stage IIA	TCGA-AO-A1KR-01
10.57	Positive	Positive	Negative	T2	N1	M0	59	Stage IIB	TCGA-AR-A0U3-01
10.5714	Positive	Positive	Negative	T2	N0 (i-)	M0	60	Stage IIA	TCGA-B6-A0RL-01
10.5765	Negative	Negative	Negative	T1c	N0 (i-)	M0	53	Stage I	TCGA-GM-A2DD-01
10.587	Positive	Positive	Negative	T1c	N0	M0	47	Stage IIA	TCGA-B6-A0IA-01
10.587	Positive	Positive	Positive	T2	N0 (i-)	M0	51	Stage I	TCGA-BH-A0B6-01
10.5925	Negative	Negative	Negative	T1	N2a	M0	62	Stage IIIA	TCGA-A2-A3XS-01
10.6184	Negative	Negative	Negative	T2	N0	M0	62	Stage IIA	TCGA-A7-A5ZV-01
10.651	Positive	Positive	Negative	T2	N0	MX	84	Stage IIA	TCGA-LL-A50Y-01
10.6591	Positive	Positive	Negative	T2	N1b	M0	49	Stage IIB	TCGA-B6-A0I5-01
10.6597	Positive	Positive	Positive	T3	N1	MX	40	Stage IIIA	TCGA-AR-A2LJ-01
10.6599	Positive	Positive	Negative	T3	N3	MX	45	Stage IIIC	TCGA-E9-A6HE-01
10.6615	Negative	Negative	Negative	T4b	N3a	M0	84	Stage IIIC	TCGA-E2-A1LK-01
10.6744	Negative	Negative	Negative	T2	N2a	MX	78	Stage IIIA	TCGA-AC-A2BK-01
10.679	Negative	Negative	Negative	T2	N0	M0	65	Stage IIA	TCGA-S3-AA10-01
10.6949	Positive	Positive	Negative	T1c	N0	M0	63	Stage IA	TCGA-BH-A5J0-01
10.7179	Negative	Negative	Negative	T3	N1a	MX	70	Stage IIIA	TCGA-EW-A1PB-01
10.718	Negative	Negative	Negative	T3	N0	MX	56	Stage IIB	TCGA-AC-A7VC-01
10.7383	Negative	Negative	Negative	T2	N0	M0	56	Stage IIA	TCGA-HN-A2NL-01
10.7458	Positive	Positive	Negative	T3	N0	M0	54	Stage IIB	TCGA-A2-A0CR-01
10.7473	Negative	Negative	Negative	T2	N1a	M0	45	Stage IIB	TCGA-A2-A3XT-01
10.7483	Positive	Negative	Positive	T1b	N0	MX	57	Stage IA	TCGA-OL-A5RZ-01
10.7495	Negative	Negative	Negative	T2	N1	M0	48	Stage IIB	TCGA-A7-A6VY-01
10.7512	Positive	Positive	Positive	T2	N0 (i+)	M0	75	Stage IIA	TCGA-BH-A42T-01
10.7595	Negative	Positive	Positive	T2	N0 (i-)	MX	50	Stage IIA	TCGA-LL-A6FR-01
10.762	Positive	Positive	Negative	T2	N0	M0	79	Stage IIA	TCGA-A7-A3RF-01
10.7927	Positive	Positive	Negative	T2	N3	M0	78	Stage IIIC	TCGA-E2-A2P5-01
10.8264	Positive	Positive	Negative	T2	N0	MX	75	Stage IIA	TCGA-EW-A423-01
10.8331	Positive	Positive	Positive	T2	N0	MX	73	Stage IIA	TCGA-UL-AAZ6-01
10.8332	Positive	Negative	Negative	T2	N1a	MX	64	Stage IIB	TCGA-LL-A5YL-01
10.8347	Negative	Negative	Negative	T2	N0	M0	35	Stage IIA	TCGA-AR-A0TU-01
10.8366	Positive	Positive	Negative	T2	N3	M0	60	Stage IIIC	TCGA-E9-A5FK-01
10.8663	Positive	Negative	Negative	T2	N1a	M0	42	Stage IIB	TCGA-A2-A3XW-01
10.9383	Positive	Positive	Negative	T1c	N0	MX	71	Stage IA	TCGA-OL-A66L-01
10.9473	Negative	Negative	Negative	T2	N0	M0	48	Stage IIA	TCGA-A7-A6VW-01
10.9872	Positive	Positive	Negative	T2	N1	M0	63	Stage IIB	TCGA-A2-A0CY-01
11.043	Positive	Positive	Positive	T3	N3a	MX	69	Stage IIIC	TCGA-LL-A9Q3-01
11.0516	Positive	Positive	Negative	T2	N2a	MX	77	Stage IIIA	TCGA-LL-A6FQ-01
11.0706	Negative	Negative	Negative	T1c	N1	MX	40	Stage IIA	TCGA-OL-A5RW-01
11.076	Positive	Positive	Negative	T2	N1a	MX	39	Stage IIB	TCGA-OL-A66O-01
11.0789	Negative	Negative	Negative	T1c	N0 (i-)	M0	69	Stage IA	TCGA-BH-A0E6-01
11.0987	Negative	Negative	Negative	T2	N0	MX	75	Stage IIA	TCGA-OL-A66P-01
11.1569	Positive	Positive	Negative	T1c	N0	MX	69	Stage IA	TCGA-E2-A576-01
11.1939	Positive	Positive	Negative	T2	N2a	MX	61	Stage IIIA	TCGA-D8-A1Y3-01
11.2023	Positive	Positive	Positive	T2	N1	M0	48	Stage IIB	TCGA-E9-A3X8-01
11.2326	Positive	Negative	Positive	T2	N0 (i-)	MX	48	Stage IIA	TCGA-AQ-A04L-01
11.2829	Positive	Positive	Negative	T2	N1a	MX	49	Stage IIB	TCGA-LL-A7SZ-01
11.301	Negative	Negative	Negative	T2	N0 (i-)	MX	73	Stage IIA	TCGA-AC-A6IW-01
11.3225	Negative	Negative	Negative	T2	N0 (i-)	M0	49	Stage IIA	TCGA-GM-A3XL-01
11.367	Negative	Negative	Negative	T2	N1	M0	59	Stage IIB	TCGA-A2-A0T0-01
11.4054	Positive	Negative	Positive	T2	N0	M0	46	Stage IIA	TCGA-A2-A3XV-01
11.4255	Negative	Negative	Negative	T2	N0	MX	70	Stage IIA	TCGA-OL-A5D7-01
11.4989	Negative	Negative	Negative	T4b	N0	M0	48	Stage IIIB	TCGA-AC-A2QJ-01
11.6252	Negative	Negative	Negative	T2	N1mi	M0	35	Stage IIB	TCGA-A2-A3XU-01
11.7437	Positive	Positive	Negative	T2	N2	M0	72	Stage IIIA	TCGA-E2-A572-01
11.8323	Positive	Negative	Negative	T2	N3a	MX	90	Stage IIIC	TCGA-E2-A9RU-01
11.8822	Negative	Negative	Negative	T2	N0	M0	44	Stage IIA	TCGA-E2-A574-01
11.9665	Positive	Positive	Positive	T4b	NX	M0	88	Stage IIIB	TCGA-LL-A5YM-01
12.0375	Positive	Positive	Negative	T2	N0	M0	84	Stage IIA	TCGA-A7-A56D-01
