# Supplementary material for: ClpP regulates breast cancer cell proliferation, invasion and apoptosis by modulating the Src/PI3K/Akt signaling pathway
Source: PeerJ. 2020 Mar 10;8:e8754. doi: 10.7717/peerj.8754 (PMC7069407; doi:10.7717/peerj.8754)
Supplement: Supplemental Information 37 [file peerj-08-8754-s037.xlsx]

## Sheet: Sheet1
T47D
Overexpression-ClpP	Overexpression-β-actin	ClpP	β-actin
14.6532	15.4956	20.1936	15.0554
14.641	16.0541	20.2659	15.1347
14.6543	16.8993	20.2806	15.2644
