# Supplementary material for: ClpP regulates breast cancer cell proliferation, invasion and apoptosis by modulating the Src/PI3K/Akt signaling pathway
Source: PeerJ. 2020 Mar 10;8:e8754. doi: 10.7717/peerj.8754 (PMC7069407; doi:10.7717/peerj.8754)
Supplement: Supplemental Information 38 [file peerj-08-8754-s038.xlsx]

## Sheet: Sheet1
	T	P	T-P
T019	0.0233069	0.0205367	0.00277015
T020	0.0200487	0.0168846	0.00316409
T022	0.0080631	0.00363495	0.00442815
T036	0.00657041	0.00470154	0.00186887
T040	0.0211324	0.0166216	0.00451083
T041	0.0122248	0.00818671	0.00403805
T044	0.0179192	0.00766446	0.0102547
T047	0.0153576	0.00657793	0.00877971
T053	0.00630538	0.00808829	-0.00178291
T056	0.0415099	0.00754978	0.0339601
T059	0.00713016	0.00977797	-0.00264781
T060	0.0258266	0.00776607	0.0180605
T061	0.0118971	0.0116498	0.00024726
T062	0.00905167	0.00548801	0.00356366
T063	0.0133488	0.00701788	0.00633088
T064	0.0115601	0.00787693	0.00368319
T103	0.0148546	0.0171031	-0.00224852
T125	0.00967783	0.0103384	-0.00066052
