# Supplementary material for: ClpP regulates breast cancer cell proliferation, invasion and apoptosis by modulating the Src/PI3K/Akt signaling pathway
Source: PeerJ. 2020 Mar 10;8:e8754. doi: 10.7717/peerj.8754 (PMC7069407; doi:10.7717/peerj.8754)
Supplement: Supplemental Information 43 [file peerj-08-8754-s043.xlsx]

## Sheet: Sheet1
MDA-MB-231	NC		Si
NC	14.607		19.8204
	15.0836		19.6795
	14.431		19.4935
si-A	15.0102		24.4285
	15.0786		24.3175
	14.7864		24.2463
si-B	15.1276		23.541
	14.8978		23.2932
	14.7662		23.1915
si-C	14.995		22.1853
	14.8354		21.8995
	14.6051		22.051
